# Supplementary material for: Synthesis and properties of ionic liquids based on mecoprop
Source: Royal Society of Chemistry journal article supplement (doi:10.1039/c8nj03435d), 2018-01-01
Supplement: c8nj03435d1.pdf [file c8nj03435d1.pdf]

## Electronic Supplementary Information

### Synthesis and properties of ionic liquids based on mecoprop

Juliusz Pernak,<sup>a\*</sup> Adrian Luboiński<sup>b</sup>, Agnieszka Łacka<sup>c</sup>, Tadeusz Praczyk<sup>b</sup>

<sup>a</sup>Department of Chemical Technology, Poznan University of Technology, Poznan 60-965, Poland

<sup>b</sup>Institute of Plant Protection, National Research Institute, Poznan 60-318, Poland

<sup>c</sup>Department of Mathematical and Statistical Methods, Poznan University of Life Sciences, Poznan 60-637, Poland

\* Corresponding author at: E-mail: [juliusz.pernak@put.poznan.pl](mailto:juliusz.pernak@put.poznan.pl)

1-Ethyl-1-methylpiperidinium 2-(4-chloro-2-methylphenoxy)propionate (**1**) 98% yield. <sup>1</sup>H NMR (300 MHz, CDCl<sub>3</sub>) δ [ppm] = 1.20 (t, *J* = 7.1 Hz, 3H); 1.57 (m, 3H); 1.62 (m, 2H); 1.71 (m, 4H); 2.22 (s, 3H); 2.96 (s, 3H); 3.31 (m, 4H); 3.40 (m, 2H); 4.48 (m, 1H); 6.78 (d, *J* = 8.5 Hz, 1H); 6.95 (m, 1H); 7.04 (d, *J* = 2.1 Hz, 1H). <sup>13</sup>C NMR (75 MHz, CDCl<sub>3</sub>) δ [ppm] = 155.7; 129.6; 128.5; 125.7; 123.7; 113.2; 75.6; 59.9; 57.9; 46.9; 20.5; 19.7; 19.1; 16.1; 7.2. Elemental analysis calcd for C<sub>18</sub>H<sub>28</sub>ClNO<sub>3</sub> (M<sub>mol</sub> = 341.9 g mol<sup>-1</sup>) (%): C = 63.24; H = 8.26; N = 4.10; found: C = 63.01; H = 8.43; N = 4.27.

1-Methyl-1-propylpiperidinium 2-(4-chloro-2-methylphenoxy)propionate (**2**) 96% yield. <sup>1</sup>H NMR (300 MHz, CDCl<sub>3</sub>) δ [ppm] = 0.92 (t, *J* = 7.2 Hz, 3H); 1.55 (m, 5H); 1.61 (m, 2H); 1.67 (m, 4H); 2.21 (s, 3H); 2.93 (s, 3H); 3.17 (m, 4H); 3.26 (m, 2H); 4.47 (m, 1H); 6.76 (d, *J* = 7.6 Hz, 1H); 6.96 (d, *J* = 6.4 Hz, 1H); 7.03 (d, *J* = 2.2 Hz, 1H). <sup>13</sup>C NMR (75 MHz, CDCl<sub>3</sub>) δ [ppm] = 155.6; 129.6; 128.5; 125.8; 123.8; 113.2; 75.3; 63.8; 60.4; 47.9; 20.5; 19.7; 19.1; 16.1; 14.9; 10.5. Elemental analysis calcd for C<sub>19</sub>H<sub>30</sub>ClNO<sub>3</sub> (M<sub>mol</sub> = 355.9 g mol<sup>-1</sup>) (%): C = 64.12; H = 8.50; N = 3.94; found: C = 63.85; H = 8.17; N = 4.23.

1-Butyl-1-methylpiperidinium 2-(4-chloro-2-methylphenoxy)propionate (**3**) 94% yield. <sup>1</sup>H NMR (300 MHz, CDCl<sub>3</sub>) δ [ppm] = 0.90 (t, *J* = 7.0 Hz, 3H); 1.30 (m, 2H); 1.57 (m, 4H); 1.62 (m, 3H); 1.67 (m, 4H); 2.20 (s, 3H); 3.09 (s, 3H); 3.38 (m, 4H); 3.49 (m, 2H); 4.47 (m, 1H); 6.77 (d, *J*

= 7.2 Hz, 1H); 6.96 (d,  $J$  = 6.2 Hz, 1H); 7.03 (d,  $J$  = 2.1 Hz, 1H)  $^{13}\text{C}$  NMR (75 MHz,  $\text{CDCl}_3$ )  $\delta$  [ppm] = 155.7; 129.6; 128.2; 125.7; 123.7; 113.2; 62.2; 60.3; 47.9; 31.4; 29.0; 28.8; 22.3; 19.8; 14.2; 13.8. Elemental analysis calcd for  $\text{C}_{20}\text{H}_{32}\text{ClNO}_3$  ( $M_{\text{mol}}$  = 369.2 g mol $^{-1}$ ) (%): C = 64.94; H = 8.72; N = 3.79; found: C = 65.18; H = 8.55; N = 3.98.

1-Methyl-1-pentylpiperidinium 2-(4-chloro-2-methylphenoxy)propionate (**4**) 97% yield.  $^1\text{H}$  NMR (300 MHz,  $\text{CDCl}_3$ )  $\delta$  [ppm] = 0.91 (t,  $J$  = 7.1 Hz, 3H); 1.33 (m, 4H); 1.56 (m, 4H); 1.63 (m, 3H); 1.74 (m, 4H); 2.22 (s, 3H); 3.09 (s, 3H); 3.38 (m, 4H); 3.48 (m, 2H); 4.46 (m, 1H); 6.79 (d,  $J$  = 8.5 Hz, 1H); 6.94 (dd,  $J$  = 2.4; 8.5 Hz, 1H); 7.03 (d,  $J$  = 2.5 Hz, 1H)  $^{13}\text{C}$  NMR (75 MHz,  $\text{CDCl}_3$ )  $\delta$  [ppm] = 176.1; 155.6; 129.5; 128.3; 125.6; 123.6; 113.2; 75.7; 62.4; 60.3; 47.7; 28.0; 21.9; 21.2; 20.4; 19.8; 19.1; 16.1; 14.9; 13.5. Elemental analysis calcd for  $\text{C}_{21}\text{H}_{34}\text{ClNO}_3$  ( $M_{\text{mol}}$  = 383.9 g mol $^{-1}$ ) (%): C = 65.69; H = 8.93; N = 3.65; found: C = 65.92; H = 8.61; N = 3.85.

1-Hexyl-1-methylpiperidinium 2-(4-chloro-2-methylphenoxy)propionate (**5**) 95% yield.  $^1\text{H}$  NMR (300 MHz,  $\text{CDCl}_3$ )  $\delta$  [ppm] = 0.89 (t,  $J$  = 6.6 Hz, 3H); 1.30 (m, 6H); 1.58 (m, 4H); 1.63 (m, 3H); 1.74 (m, 4H); 2.23 (s, 3H); 3.06 (s, 3H); 3.34 (m, 4H); 3.43 (m, 2H); 4.47 (m, 1H); 6.79 (d,  $J$  = 8.6 Hz, 1H); 6.94 (dd,  $J$  = 2.4; 8.4 Hz, 1H); 7.03 (d,  $J$  = 2.63 Hz, 1H)  $^{13}\text{C}$  NMR (75 MHz,  $\text{CDCl}_3$ )  $\delta$  [ppm] = 176.2; 155.7; 129.6; 128.4; 125.6; 123.6; 113.5; 75.6; 62.5; 60.4; 47.9; 31.0; 25.7; 22.1; 21.6; 20.4; 19.8; 19.1; 16.1; 13.6. Elemental analysis calcd for  $\text{C}_{22}\text{H}_{36}\text{ClNO}_3$  ( $M_{\text{mol}}$  = 397.9 g mol $^{-1}$ ) (%): C = 66.39; H = 9.12; N = 3.52; found: C = 66.22; H = 8.87; N = 3.76.

1-Heptyl-1-methylpiperidinium 2-(4-chloro-2-methylphenoxy)propionate (**6**) 94% yield.  $^1\text{H}$  NMR (300 MHz,  $\text{CDCl}_3$ )  $\delta$  [ppm] = 0.89 (t,  $J$  = 6.9 Hz, 3H); 1.30 (m, 8H); 1.57 (m, 4H); 1.63 (m, 3H); 1.74 (m, 4H); 2.22 (s, 3H); 3.06 (s, 3H); 3.36 (m, 4H); 3.43 (m, 2H); 4.47 (m, 1H); 6.76 (d,  $J$  = 8.6 Hz, 1H); 6.94 (dd,  $J$  = 2.2; 8.6 Hz, 1H); 7.04 (d,  $J$  = 2.0 Hz, 1H)  $^{13}\text{C}$  NMR (75 MHz,  $\text{CDCl}_3$ )  $\delta$  [ppm] = 155.5; 129.5; 128.3; 125.6; 123.6; 113.0; 75.5; 62.4; 60.3; 47.7; 31.2; 28.5; 25.9; 22.1; 21.5; 20.3; 19.7; 19.0; 16.1; 13.7. Elemental analysis calcd for  $\text{C}_{23}\text{H}_{38}\text{ClNO}_3$  ( $M_{\text{mol}}$  = 412.0 g mol $^{-1}$ ) (%): C = 67.05; H = 9.30; N = 3.40; found: C = 67.35; H = 9.52; N = 3.59.

1-Methyl-1-octylpiperidinium 2-(4-chloro-2-methylphenoxy)propionate (**7**) 96% yield.  $^1\text{H}$  NMR (300 MHz,  $\text{CDCl}_3$ )  $\delta$  [ppm] = 0.89 (t,  $J$  = 6.9 Hz, 3H); 1.30 (m, 10H); 1.57 (m, 4H); 1.63 (m, 3H); 1.74 (m, 4H); 2.22 (s, 3H); 3.05 (s, 3H); 3.36 (m, 4H); 3.43 (m, 2H); 4.47 (m, 1H); 6.76 (d,  $J$  = 8.6 Hz, 1H); 6.94 (dd,  $J$  = 2.3; 8.5 Hz, 1H); 7.04 (d,  $J$  = 2.0 Hz, 1H)  $^{13}\text{C}$  NMR (75 MHz,  $\text{CDCl}_3$ )  $\delta$  [ppm] = 176.0; 155.6; 129.5; 128.3; 125.6;

123.5; 113.1; 75.5; 62.2; 60.2; 47.7; 31.3; 28.8; 28.7; 26.0; 22.2; 21.5; 20.3; 19.7; 19.0; 16.1; 13.7. Elemental analysis calcd for  $C_{24}H_{40}ClNO_3$  ( $M_{mol} = 426.0 \text{ g mol}^{-1}$ ) (%): C = 67.66; H = 9.46; N = 3.29; found: C = 67.91; H = 9.17; N = 3.42.

1-Methyl-1-nonylpiperidinium 2-(4-chloro-2-methylphenoxy)propionate (**8**) 92% yield.  $^1H$  NMR (300 MHz,  $CDCl_3$ )  $\delta$  [ppm] = 0.88 (t,  $J = 6.7$  Hz, 3H); 1.26 (m, 12H); 1.56 (m, 4H); 1.63 (m, 3H); 1.76 (m, 4H); 2.23 (s, 3H); 3.08 (s, 3H); 3.36 (m, 4H); 3.46 (m, 2H); 4.50 (m, 1H); 6.79 (d,  $J = 8.7$  Hz, 1H); 6.94 (dd,  $J = 2.4$ ; 8.6 Hz, 1H); 7.04 (d,  $J = 1.95$  Hz, 1H)  $^{13}C$  NMR (75 MHz,  $CDCl_3$ )  $\delta$  [ppm] = 176.2; 155.7; 129.6; 128.5; 125.7; 123.7; 113.2; 75.7; 62.3; 60.4; 48.0; 31.5; 29.1; 29.0; 28.9; 26.2; 22.4; 21.7; 20.5; 19.9; 19.2; 16.2; 13.9. Elemental analysis calcd for  $C_{25}H_{42}ClNO_3$  ( $M_{mol} = 440.0 \text{ g mol}^{-1}$ ) (%): C = 68.23; H = 9.62; N = 3.18; found: C = 67.93; H = 9.38; N = 3.40.

1-Decyl-1-methylpiperidinium 2-(4-chloro-2-methylphenoxy)propionate (**9**) 98% yield.  $^1H$  NMR (300 MHz,  $CDCl_3$ )  $\delta$  [ppm] = 0.88 (t,  $J = 6.7$  Hz, 3H); 1.26 (m, 14H); 1.57 (m, 4H); 1.64 (m, 3H); 1.76 (m, 4H); 2.22 (s, 3H); 3.07 (s, 3H); 3.36 (m, 4H); 3.44 (m, 2H); 4.47 (m, 1H); 6.79 (d,  $J = 8.4$  Hz, 1H); 6.95 (d,  $J = 6.1$  Hz, 1H); 7.03 (d,  $J = 2.47$  Hz, 1H)  $^{13}C$  NMR (75 MHz,  $CDCl_3$ )  $\delta$  [ppm] = 176.1; 155.7; 129.6; 128.4; 125.7; 123.7; 113.2; 75.6; 62.4; 60.4; 47.9; 31.5; 29.1; 29.1; 29.0; 28.9; 26.1; 22.3; 21.6; 20.4; 19.8; 19.1; 16.1; 13.8. Elemental analysis calcd for  $C_{26}H_{44}ClNO_3$  ( $M_{mol} = 454.0 \text{ g mol}^{-1}$ ) (%): C = 68.77; H = 9.77; N = 3.08; found: C = 68.44; H = 9.61; N = 3.33.

1-Methyl-1-undecylpiperidinium 2-(4-chloro-2-methylphenoxy)propionate (**10**) 95% yield.  $^1H$  NMR (300 MHz,  $CDCl_3$ )  $\delta$  [ppm] = 0.88 (t,  $J = 6.8$  Hz, 3H); 1.26 (m, 16H); 1.56 (m, 4H); 1.65 (m, 3H); 1.74 (m, 4H); 2.23 (s, 3H); 3.08 (s, 3H); 3.36 (m, 4H); 3.45 (m, 2H); 4.50 (m, 1H); 6.79 (d,  $J = 8.6$  Hz, 1H); 6.94 (dd,  $J = 2.5$ ; 8.6 Hz, 1H); 7.03 (d,  $J = 3.3$  Hz, 1H)  $^{13}C$  NMR (75 MHz,  $CDCl_3$ )  $\delta$  [ppm] = 176.0; 155.6; 129.5; 128.4; 125.6; 123.6; 113.1; 75.5; 62.3; 60.3; 47.8; 31.5; 29.2; 29.1; 29.0; 28.9; 26.0; 22.3; 21.6; 20.4; 19.7; 19.0; 16.1; 13.8. Elemental analysis calcd for  $C_{27}H_{46}ClNO_3$  ( $M_{mol} = 468.1 \text{ g mol}^{-1}$ ) (%): C = 69.28; H = 9.90; N = 2.99; found: C = 69.56; H = 10.21; N = 3.12.

1-Dodecyl-1-methylpiperidinium 2-(4-chloro-2-methylphenoxy)propionate (**11**) 99% yield.  $^1H$  NMR (300 MHz,  $CDCl_3$ )  $\delta$  [ppm] = 0.88 (t,  $J = 6.8$  Hz, 3H); 1.26 (m, 18H); 1.56 (m, 4H); 1.63 (m, 3H); 1.76 (m, 4H); 2.22 (s, 3H); 3.07 (s, 3H); 3.30 (m, 4H); 3.45 (m, 2H); 4.46 (m, 1H); 6.76 (d,  $J = 8.6$  Hz, 1H); 6.95 (dd,  $J = 2.6$ ; 8.6 Hz, 1H); 7.03 (d,  $J = 2.6$  Hz, 1H)  $^{13}C$  NMR (75 MHz,  $CDCl_3$ )  $\delta$  [ppm] = 176.4; 155.7; 129.6; 128.5; 125.8; 123.7; 113.2; 75.8; 62.2; 60.4; 48.1; 31.7; 29.4; 29.3; 29.2; 29.1; 29.0; 26.2; 22.5; 21.7; 20.5; 19.8. 19.2; 16.2; 13.9. Elemental analysis calcd for  $C_{28}H_{48}ClNO_3$  ( $M_{mol} = 482.1 \text{ g mol}^{-1}$ ) (%): C = 69.75; H = 10.03; N = 2.91; found: C = 69.48; H = 9.88; N = 3.17.

1-Methyl-1-tetradecylpiperidinium 2-(4-chloro-2-methylphenoxy)propionate (**12**) 93% yield.  $^1\text{H}$  NMR (300 MHz,  $\text{CDCl}_3$ )  $\delta$  [ppm] = 0.88 (t,  $J$  = 6.8 Hz, 3H); 1.26 (m, 22H); 1.56 (m, 4H); 1.67 (m, 3H); 1.75 (m, 4H); 2.23 (s, 3H); 3.08 (s, 3H); 3.36 (m, 4H); 3.47 (m, 2H); 4.48 (m, 1H); 6.79 (d,  $J$  = 8.7 Hz, 1H); 6.94 (dd,  $J$  = 2.4; 8.5 Hz, 1H); 7.04 (d,  $J$  = 2.6 Hz, 1H)  $^{13}\text{C}$  NMR (75 MHz,  $\text{CDCl}_3$ )  $\delta$  [ppm] = 176.1; 155.7; 129.6; 128.4; 123.6; 113.1; 75.5; 62.3; 60.3; 47.9; 31.6; 29.4; 29.3; 29.2; 29.1; 29.0; 28.9; 26.1; 22.4; 21.6; 20.4; 19.8; 19.1; 16.1; 13.9 Elemental analysis calcd for  $\text{C}_{30}\text{H}_{52}\text{ClNO}_3$  ( $M_{\text{mol}}$  = 510.1 g mol $^{-1}$ ) (%): C = 70.62; H = 10.27; N = 2.75; found: C = 70.45; H = 10.49; N = 2.90.

1-Hexadecyl-1-methylpiperidinium 2-(4-chloro-2-methylphenoxy)propionate (**13**) 92% yield.  $^1\text{H}$  NMR (300 MHz,  $\text{CDCl}_3$ )  $\delta$  [ppm] = 0.88 (t,  $J$  = 6.6 Hz, 3H); 1.26 (m, 24H); 1.58 (m, 4H); 1.64 (m, 3H); 1.75 (m, 4H); 2.23 (s, 3H); 3.09 (s, 3H); 3.33 (m, 4H); 3.46 (m, 2H); 4.51 (m, 1H); 6.79 (d,  $J$  = 8.6 Hz, 1H); 6.95 (dd,  $J$  = 2.5; 8.6 Hz, 1H); 7.03 (d,  $J$  = 2.6 Hz, 1H)  $^{13}\text{C}$  NMR (75 MHz,  $\text{CDCl}_3$ )  $\delta$  [ppm] = 176.2; 155.8; 129.7; 128.6; 125.8; 123.8; 113.2; 75.6; 62.3; 60.4; 48.1; 31.7; 29.5; 29.4; 29.3; 29.2; 29.1; 29.0; 26.3; 22.5; 21.7; 20.5; 19.9; 19.2; 16.2; 13.9 Elemental analysis calcd for  $\text{C}_{32}\text{H}_{56}\text{ClNO}_3$  ( $M_{\text{mol}}$  = 538.2 g mol $^{-1}$ ) (%): C = 71.41; H = 10.49; N = 2.60; found: C = 71.71; H = 10.11; N = 2.82.

1-Methyl-1-octadecylpiperidinium 2-(4-chloro-2-methylphenoxy)propionate (**14**) 94% yield.  $^1\text{H}$  NMR (300 MHz,  $\text{CDCl}_3$ )  $\delta$  [ppm] = 0.88 (t,  $J$  = 6.7 Hz, 3H); 1.26 (m, 28H); 1.58 (m, 4H); 1.64 (m, 3H); 1.73 (m, 4H); 2.22 (s, 3H); 3.09 (s, 3H); 3.37 (m, 4H); 3.49 (m, 2H); 4.46 (m, 1H); 6.80 (d,  $J$  = 8.6 Hz, 1H); 6.94 (dd,  $J$  = 2.4; 8.6 Hz, 1H); 7.03 (d,  $J$  = 2.0 Hz, 1H)  $^{13}\text{C}$  NMR (75 MHz,  $\text{CDCl}_3$ )  $\delta$  [ppm] = 176.0; 155.7; 129.5; 128.4; 125.7; 123.6; 113.2; 75.7; 62.2; 60.2; 47.8; 31.6; 29.3; 29.2; 29.1; 29.0; 28.9; 26.1; 22.4; 21.6; 20.4; 19.8; 19.1; 16.1; 13.8; Elemental analysis calcd for  $\text{C}_{34}\text{H}_{60}\text{ClNO}_3$  ( $M_{\text{mol}}$  = 566.3 g mol $^{-1}$ ) (%): C = 72.11; H = 10.68; N = 2.47; found: C = 72.39; H = 10.95; N = 2.62.

### Greenhouse experiments

Due to the fact that commercial preparations comprising MCPP-P were not available on the market, the herbicidal effects were compared with a commercial herbicide: MCPA in the form of sodium and potassium salts (Chwastox Extra 300 SL). The samples were dissolved in water in an amount, which equalled 400 g of active substance per 1 ha. The test plants included common lambsquarters (*Chenopodium album* L.), cornflower (*Centaurea cyanus* L.) and white mustard (*Sinapis alba* L.). The seeds were planted to pots (volume of 0.82 L) filled with a slightly acidic (pH 5.2 – 6.3) substrate for growing plants. After growing of leaves the plants were thinned to 5 per pot. After reaching the BBCH 14/16 stage, the plants were treated with a spray, which included the studied compounds. A cabin sprayer equipped with a Tee Jet XR 110/02 VP spraying nozzle

was used. The sprayer was placed 50 cm from the plant tops and moved at a constant velocity of 3.36 km/h. The liquid pressure in the sprayer was at 0.15 MPA, the working solution was applied at 200 L per 1 ha. After treatment the plants in the pots were placed in the greenhouse. The greenhouse tests were carried out under the following conditions: temperature – 20°C ( $\pm 2^\circ\text{C}$ ), humidity – 60%, photoperiod day/night – 16/8 hours. The efficacy of the studied compounds was evaluated visually 1 week, 2 weeks and 3 after treatment (WAT) in comparison to control (plants not treated with herbicides). The results of the evaluation were expressed in a percentage scale, where 100% refers to total destruction of weeds, whereas 0% refers to a lack of effect of the tested compounds. All tests were conducted using 4 repetitions.

|                        |                                                                 |                       |       |                      |             |                  |                |
|------------------------|-----------------------------------------------------------------|-----------------------|-------|----------------------|-------------|------------------|----------------|
| Acquisition Time (sec) | 4.9999                                                          | Comment               | AB 27 | Date                 | Apr 16 2015 | Date Stamp       | Apr 16 2015    |
| File Name              | C:\Users\Niemcz\Desktop\Nowy folder\AB27-H1.fid\AB27-H1.fid\fid |                       |       | Frequency (MHz)      | 300.07      | Nucleus          | <sup>1</sup> H |
| Number of Transients   | 64                                                              | Original Points Count | 16458 | Points Count         | 32768       | Pulse Sequence   | s2pul          |
| Solvent                | CHLOROFORM-d                                                    |                       |       | Receiver Gain        | 6.00        | Spectrum Type    | STANDARD       |
| Temperature (degree C) | AMBIENT TEMPERATURE                                             |                       |       | Spectrum Offset (Hz) | 1505.5831   | Sweep Width (Hz) | 3291.64        |

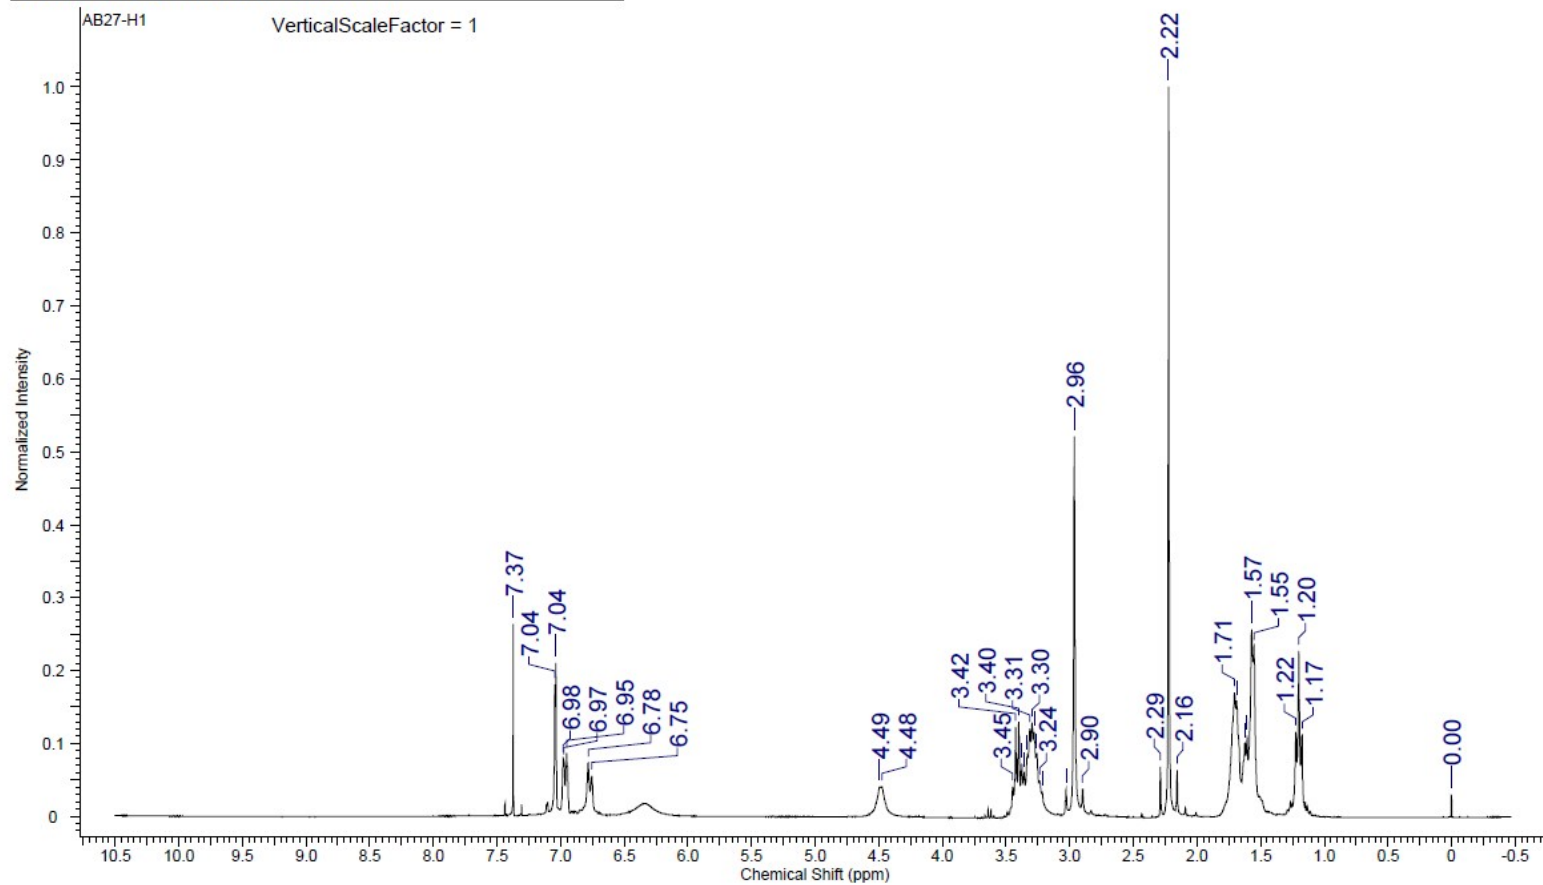

**Figure S1.** <sup>1</sup>H NMR spectrum of 1-ethyl-1-methylpiperidinium 2-(4-chloro-2-methylphenoxy)propionate (**1**)

|                        |                                                                   |                      |          |                       |                 |                                            |             |
|------------------------|-------------------------------------------------------------------|----------------------|----------|-----------------------|-----------------|--------------------------------------------|-------------|
| Acquisition Time (sec) | 0.6400                                                            | Comment              | AB 27    | Date                  | Apr 16 2015     | Date Stamp                                 | Apr 16 2015 |
| File Name              | C:\Users\Niemcz\Desktop\Nowy folder\AB27-C13.fid\AB27-C13.fid\fid |                      |          |                       | Frequency (MHz) | 75.46                                      |             |
| Nucleus                | <sup>13</sup> C                                                   | Number of Transients | 1628     | Original Points Count | 12191           | Points Count                               | 16384       |
| Pulse Sequence         | s2pul                                                             | Receiver Gain        | 34.00    | Solvent               | CHLOROFORM-d    |                                            |             |
| Spectrum Offset (Hz)   | 7947.3286                                                         | Spectrum Type        | STANDARD | Sweep Width (Hz)      | 19047.62        | Temperature (degree C) AMBIENT TEMPERATURE |             |

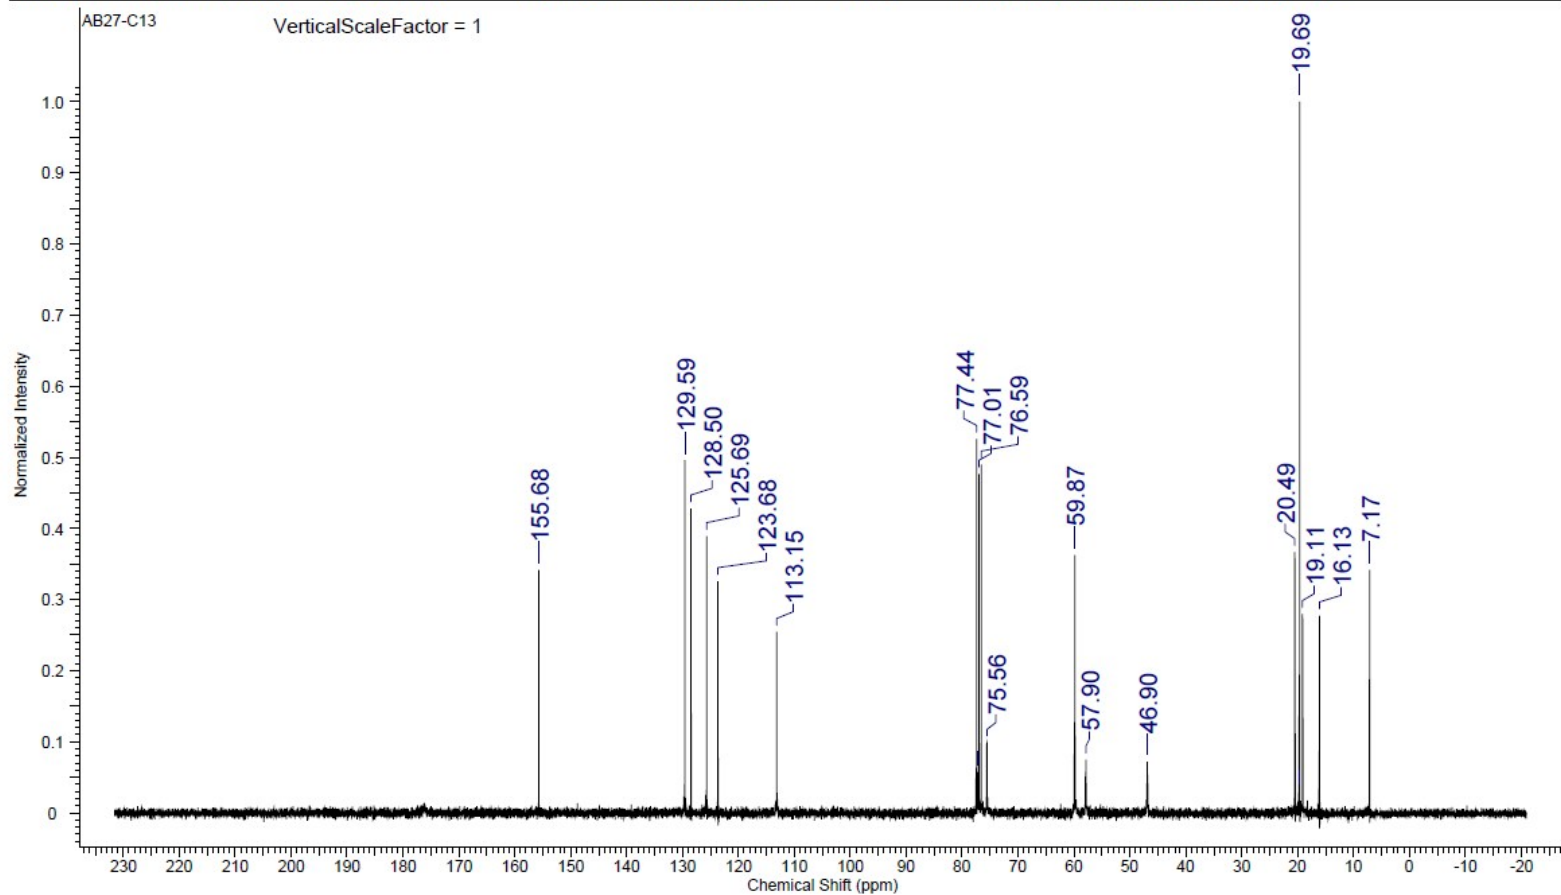

**Figure S2.** <sup>13</sup>C NMR spectrum of 1-ethyl-1-methylpiperidinium 2-(4-chloro-2-methylphenoxy)propionate (**1**)

|                        |                                                             |                       |       |                      |             |                 |             |                  |         |
|------------------------|-------------------------------------------------------------|-----------------------|-------|----------------------|-------------|-----------------|-------------|------------------|---------|
| Acquisition Time (sec) | 4.5002                                                      | Comment               | AB-28 | Date                 | Apr 23 2015 | Date Stamp      | Apr 23 2015 |                  |         |
| File Name              | C:\Users\Niemcz\Desktop\Nowy folder\AB-28.fid\AB-28.fid\fid |                       |       |                      |             | Frequency (MHz) | 402.64      | Nucleus          | 1H      |
| Number of Transients   | 64                                                          | Original Points Count | 20090 | Points Count         | 32768       | Pulse Sequence  | s2pul       | Receiver Gain    | 24.00   |
| Solvent                | CHLOROFORM-d                                                |                       |       | Spectrum Offset (Hz) | 1978.6017   | Spectrum Type   | STANDARD    | Sweep Width (Hz) | 4464.29 |
| Temperature (degree C) | AMBIENT TEMPERATURE                                         |                       |       |                      |             |                 |             |                  |         |

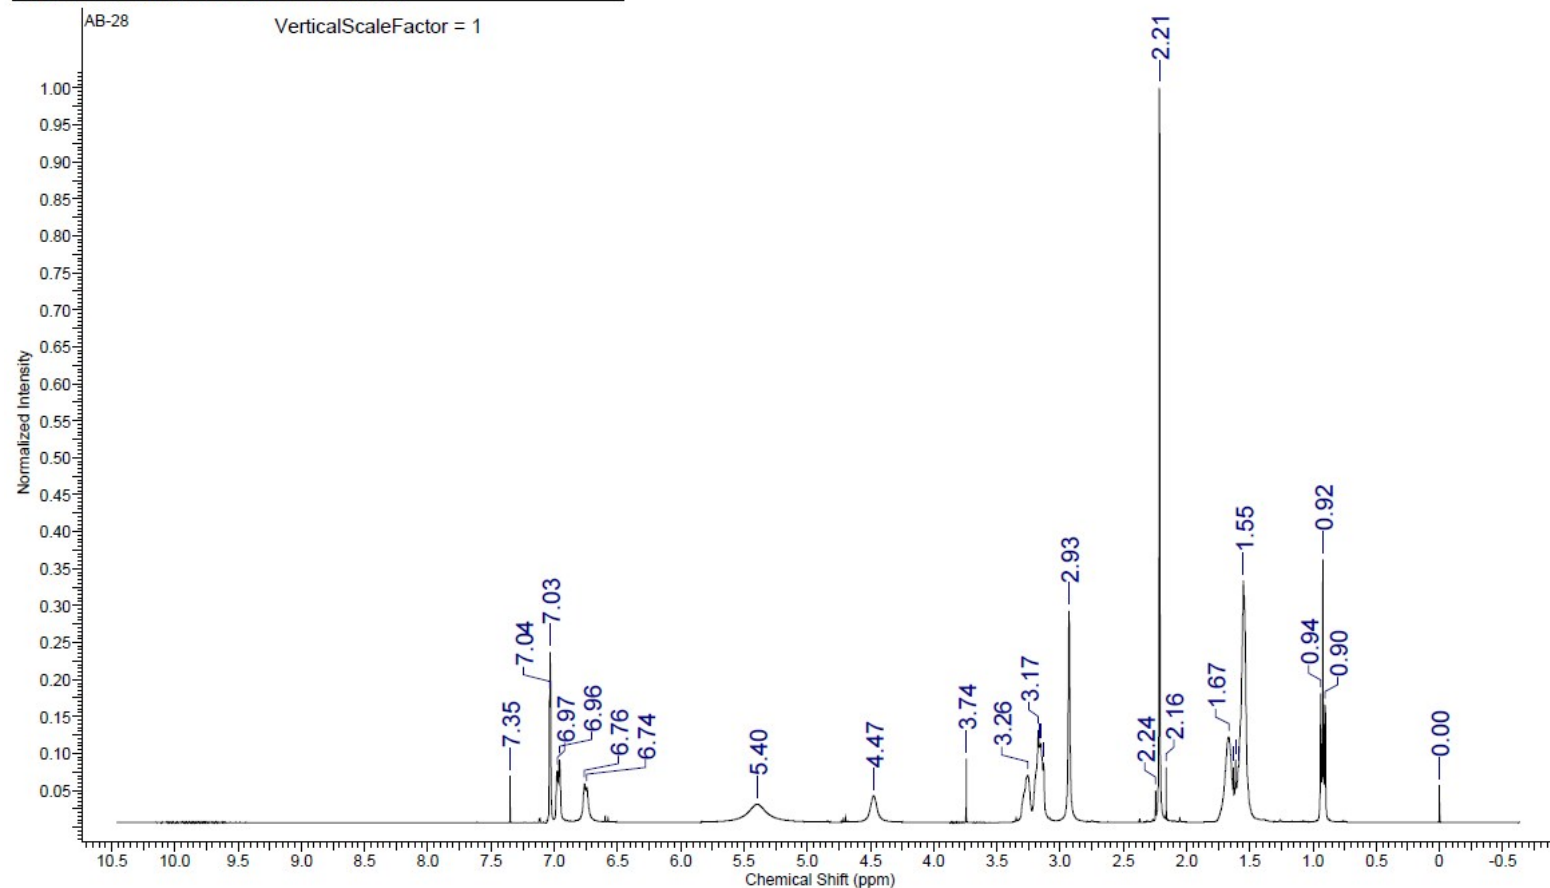

**Figure S3.**  $^1\text{H}$  NMR spectrum of 1-methyl-1-propylpiperidinium 2-(4-chloro-2-methylphenoxy)propionate (**2**)



|                        |                                                                     |                      |          |                       |              |                        |                     |
|------------------------|---------------------------------------------------------------------|----------------------|----------|-----------------------|--------------|------------------------|---------------------|
| Acquisition Time (sec) | 1.3010                                                              | Comment              | AB-28    | Date                  | Apr 23 2015  | Date Stamp             | Apr 23 2015         |
| File Name              | C:\Users\Niemcz\Desktop\Nowy folder\AB-28-C13.fid\AB-28-C13.fid\fid |                      |          |                       |              | Frequency (MHz)        | 101.25              |
| Nucleus                | <sup>13</sup> C                                                     | Number of Transients | 1436     | Original Points Count | 28039        | Points Count           | 32768               |
| Pulse Sequence         | s2pul                                                               | Receiver Gain        | 40.00    | Solvent               | CHLOROFORM-d |                        |                     |
| Spectrum Offset (Hz)   | 9601.1943                                                           | Spectrum Type        | STANDARD | Sweep Width (Hz)      | 21551.72     | Temperature (degree C) | AMBIENT TEMPERATURE |

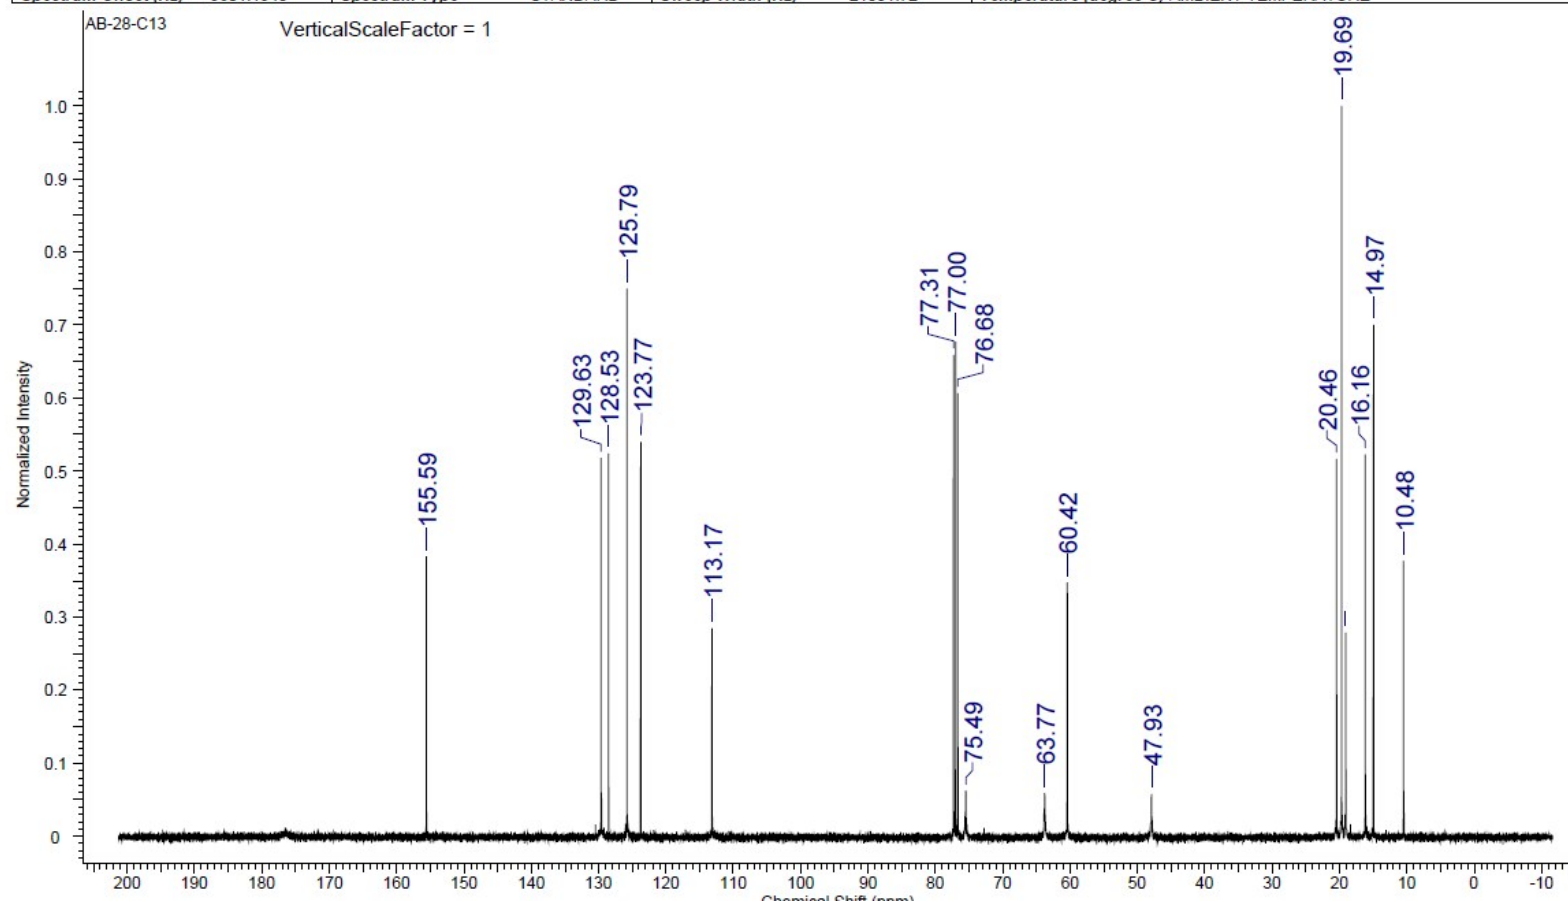

**Figure S4.** <sup>13</sup>C NMR spectrum of 1-methyl-1-propylpiperidinium 2-(4-chloro-2-methylphenoxy)propionate (**2**)

|                        |                                                         |                       |       |                      |             |                 |             |                  |         |
|------------------------|---------------------------------------------------------|-----------------------|-------|----------------------|-------------|-----------------|-------------|------------------|---------|
| Acquisition Time (sec) | 5.0001                                                  | Comment               | AB 29 | Date                 | Jan 30 2015 | Date Stamp      | Jan 30 2015 |                  |         |
| File Name              | C:\Users\Niemcz\Desktop\Nowy folder\AB-29.fid\AB-29.fid |                       |       |                      |             | Frequency (MHz) | 402.64      | Nucleus          | 1H      |
| Number of Transients   | 40                                                      | Original Points Count | 29905 | Points Count         | 32768       | Pulse Sequence  | s2pul       | Receiver Gain    | 24.00   |
| Solvent                | CHLOROFORM-d                                            |                       |       | Spectrum Offset (Hz) | 2698.3052   | Spectrum Type   | STANDARD    | Sweep Width (Hz) | 5980.86 |
| Temperature (degree C) | AMBIENT TEMPERATURE                                     |                       |       |                      |             |                 |             |                  |         |

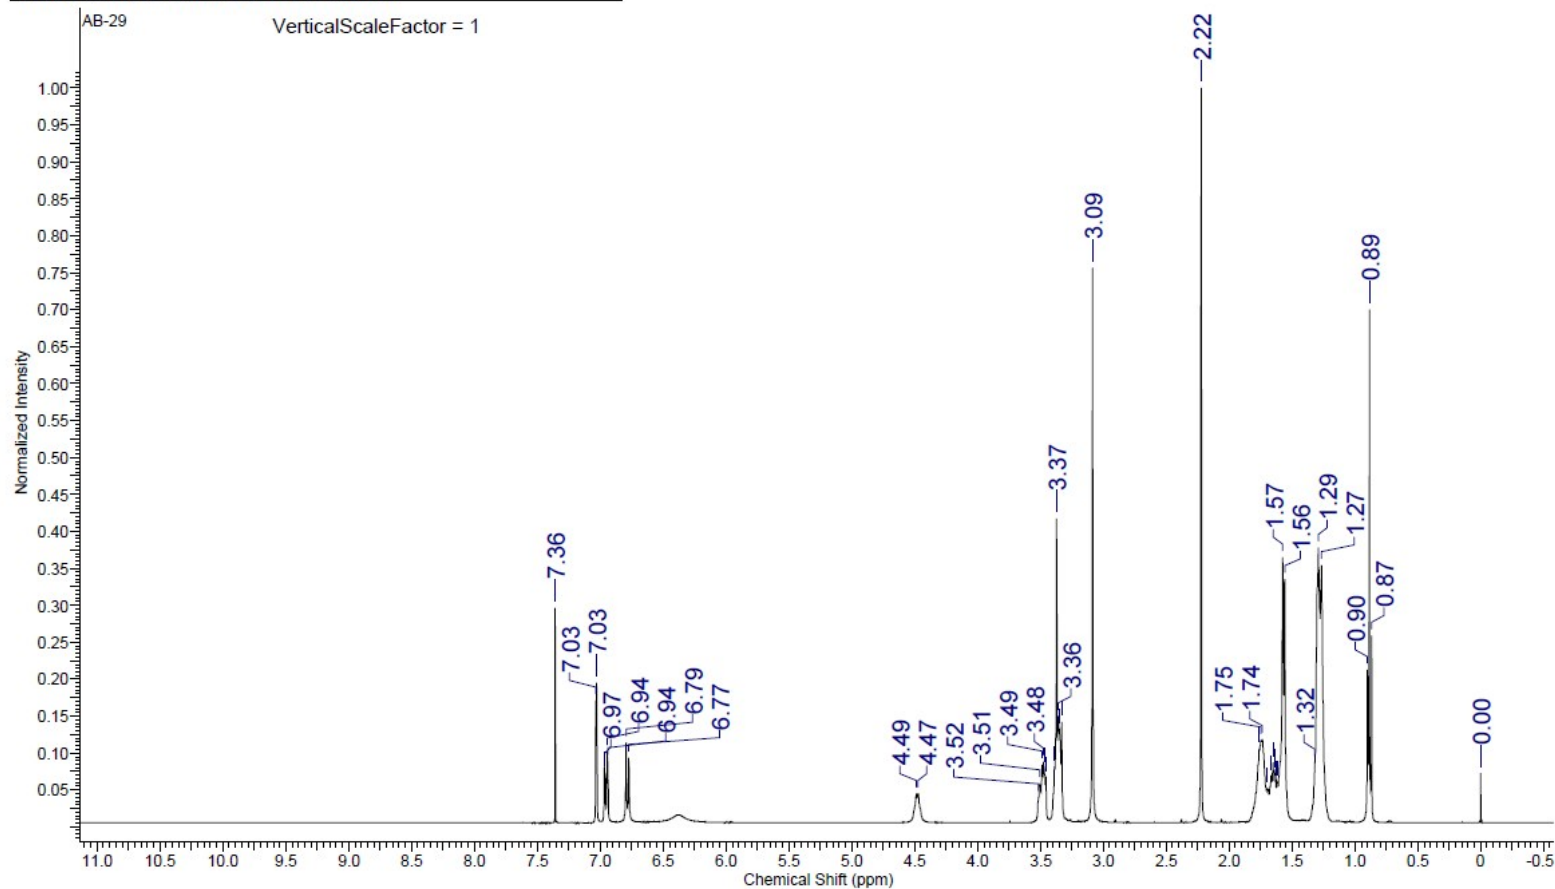

**Figure S5.** <sup>1</sup>H NMR spectrum of 1-butyl-1-methylpiperidinium 2-(4-chloro-2-methylphenoxy)propionate (**3**)

|                        |                                                                     |                      |          |                       |                 |                                            |             |
|------------------------|---------------------------------------------------------------------|----------------------|----------|-----------------------|-----------------|--------------------------------------------|-------------|
| Acquisition Time (sec) | 1.3010                                                              | Comment              | AB 29    | Date                  | Jan 30 2015     | Date Stamp                                 | Jan 30 2015 |
| File Name              | C:\Users\Niemcz\Desktop\Nowy folder\AB-29-c13.fid\AB-29-c13.fid\fid |                      |          |                       | Frequency (MHz) | 101.25                                     |             |
| Nucleus                | <sup>13</sup> C                                                     | Number of Transients | 808      | Original Points Count | 28039           | Points Count                               | 32768       |
| Pulse Sequence         | s2pul                                                               | Receiver Gain        | 40.00    | Solvent               | CHLOROFORM-d    |                                            |             |
| Spectrum Offset (Hz)   | 9601.8525                                                           | Spectrum Type        | STANDARD | Sweep Width (Hz)      | 21551.72        | Temperature (degree C) AMBIENT TEMPERATURE |             |

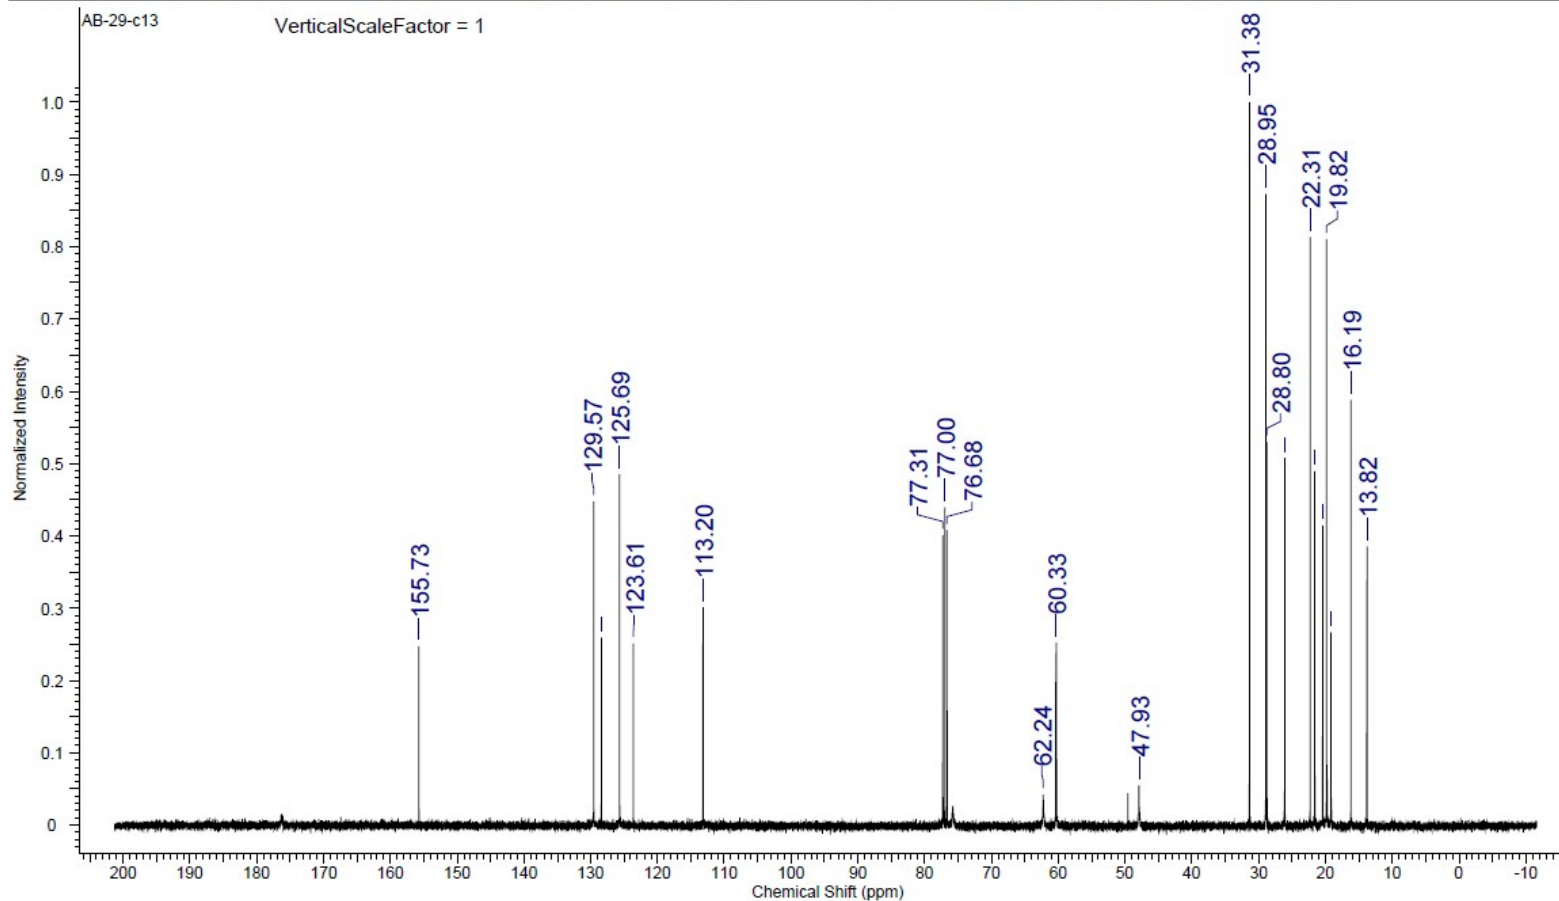

**Figure S6.** <sup>13</sup>C NMR spectrum of 1-butyl-1-methylpiperidinium 2-(4-chloro-2-methylphenoxy)propionate (**3**)

|                        |                                                             |                       |                      |              |               |                 |                  |               |       |
|------------------------|-------------------------------------------------------------|-----------------------|----------------------|--------------|---------------|-----------------|------------------|---------------|-------|
| Acquisition Time (sec) | 5.0001                                                      | Comment               | AB-30                | Date         | Jan 30 2015   | Date Stamp      | Jan 30 2015      |               |       |
| File Name              | C:\Users\Niemcz\Desktop\Nowy folder\AB-30.fid\AB-30.fid.fid |                       |                      |              |               | Frequency (MHz) | 402.64           | Nucleus       | 1H    |
| Number of Transients   | 44                                                          | Original Points Count | 29905                | Points Count | 32768         | Pulse Sequence  | s2pul            | Receiver Gain | 20.00 |
| Solvent                | CHLOROFORM-d                                                |                       | Spectrum Offset (Hz) | 2716.4661    | Spectrum Type | STANDARD        | Sweep Width (Hz) | 5980.86       |       |
| Temperature (degree C) | AMBIENT TEMPERATURE                                         |                       |                      |              |               |                 |                  |               |       |

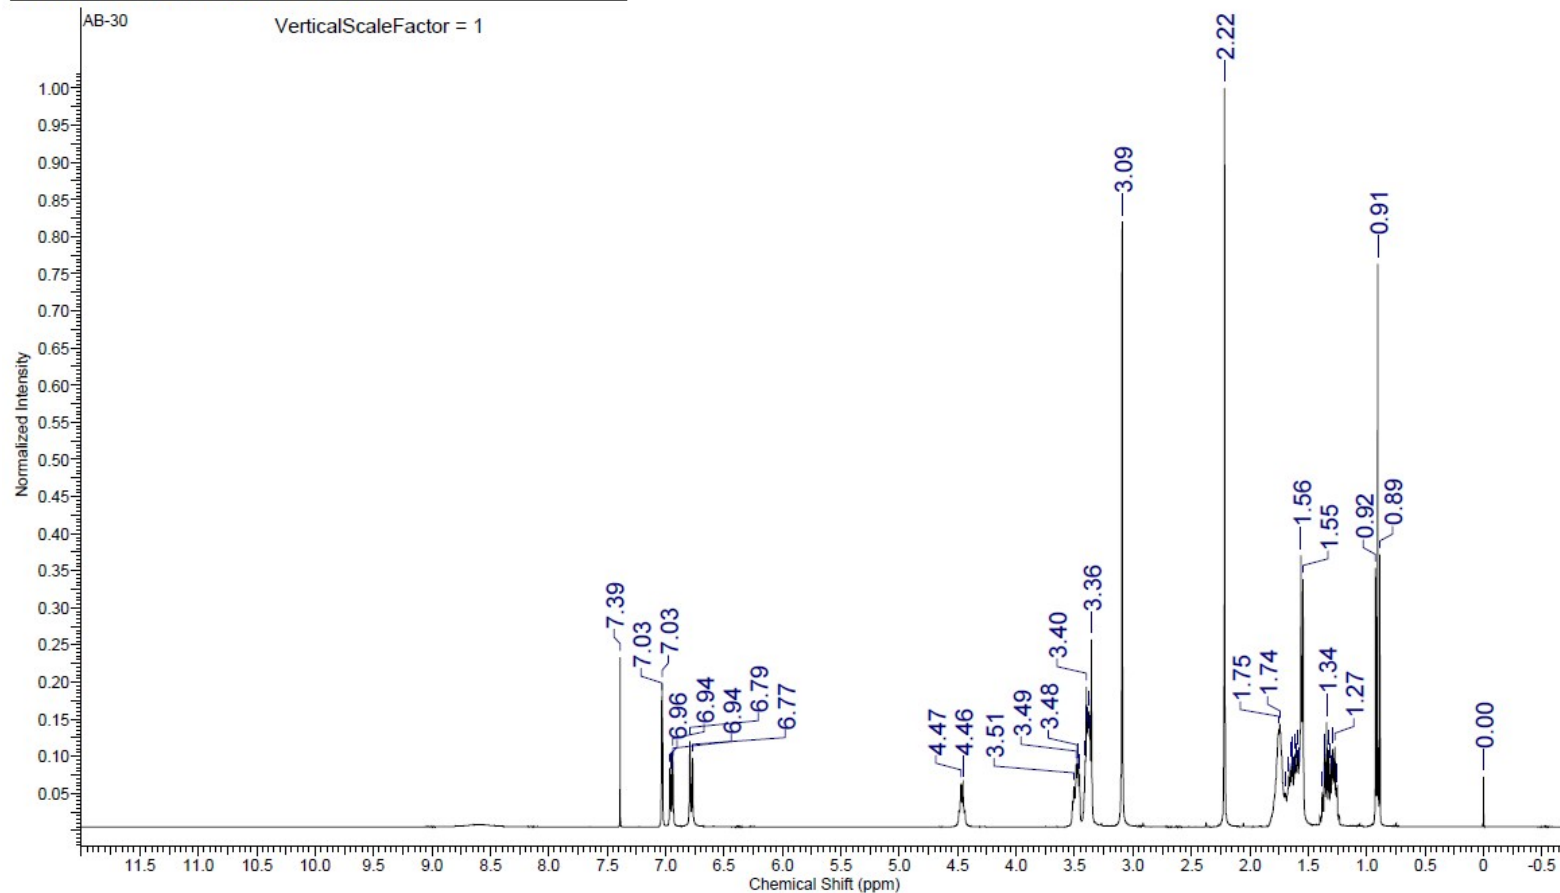

**Figure S7.**  $^1\text{H}$  NMR spectrum of 1-methyl-1-pentylpiperidinium 2-(4-chloro-2-methylphenoxy)propionate (**4**)

|                        |                                                                     |                      |          |                       |                 |                                            |             |
|------------------------|---------------------------------------------------------------------|----------------------|----------|-----------------------|-----------------|--------------------------------------------|-------------|
| Acquisition Time (sec) | 1.3010                                                              | Comment              | AB-30    | Date                  | Jan 30 2015     | Date Stamp                                 | Jan 30 2015 |
| File Name              | C:\Users\Niemcz\Desktop\Nowy folder\AB-30-c13.fid\AB-30-c13.fid\fid |                      |          |                       | Frequency (MHz) | 101.25                                     |             |
| Nucleus                | <sup>13</sup> C                                                     | Number of Transients | 420      | Original Points Count | 30684           | Points Count                               | 32768       |
| Pulse Sequence         | s2pul                                                               | Receiver Gain        | 40.00    | Solvent               | CHLOROFORM-d    |                                            |             |
| Spectrum Offset (Hz)   | 10608.9492                                                          | Spectrum Type        | STANDARD | Sweep Width (Hz)      | 23584.91        | Temperature (degree C) AMBIENT TEMPERATURE |             |

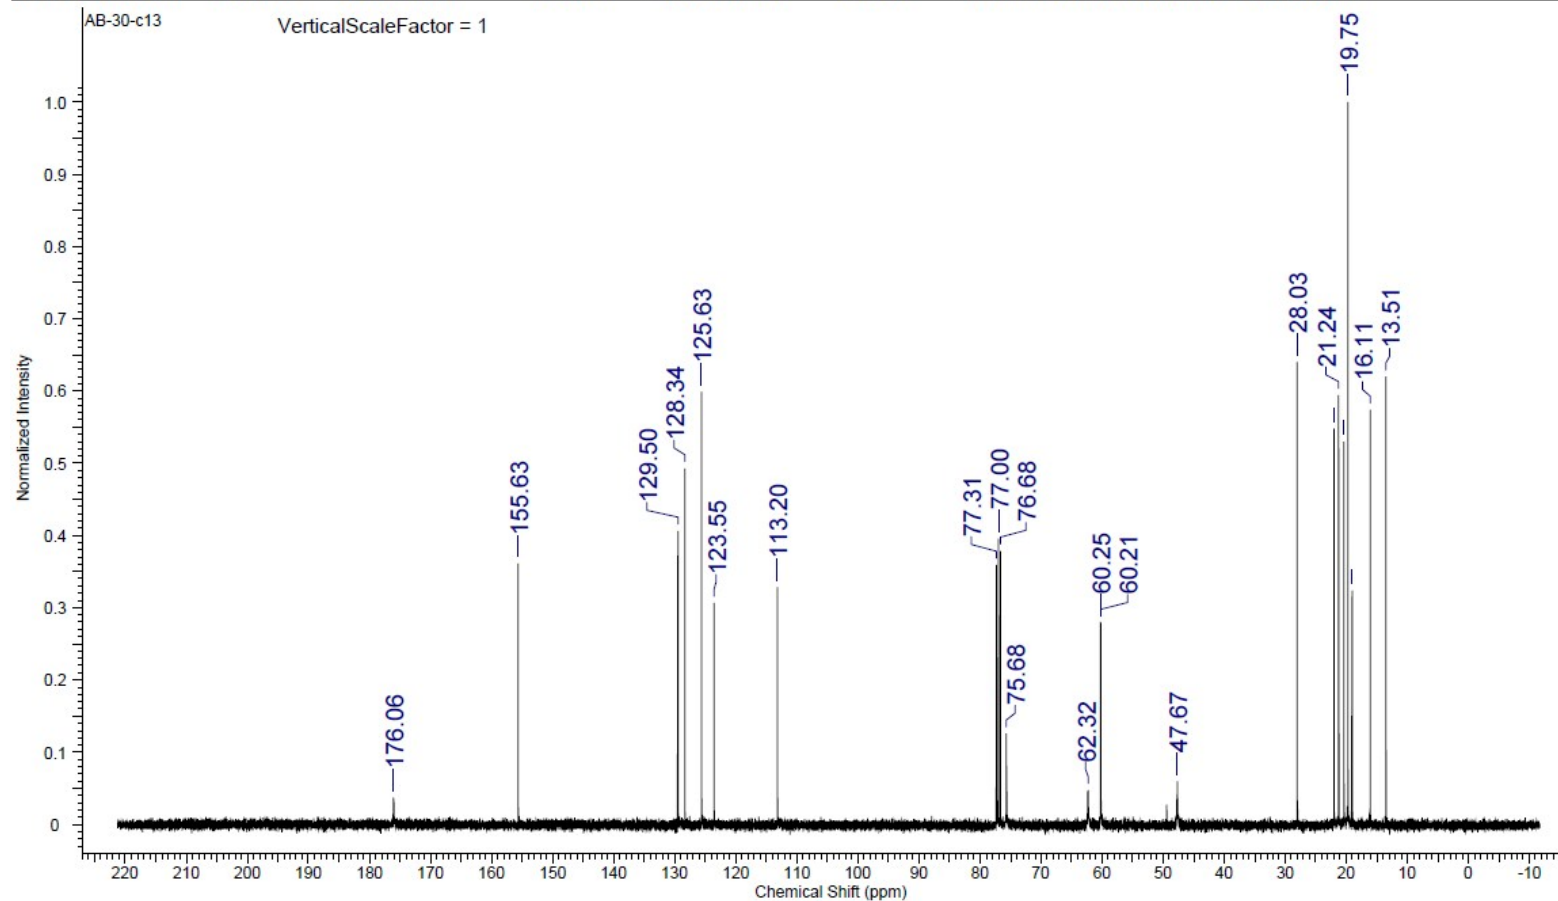

**Figure S8.** <sup>13</sup>C NMR spectrum of 1-methyl-1-pentylpiperidinium 2-(4-chloro-2-methylphenoxy)propionate (**4**)

|                        |                                                                 |                       |       |                      |             |                 |             |                  |         |
|------------------------|-----------------------------------------------------------------|-----------------------|-------|----------------------|-------------|-----------------|-------------|------------------|---------|
| Acquisition Time (sec) | 5.0001                                                          | Comment               | AB 31 | Date                 | Apr 17 2015 | Date Stamp      | Apr 17 2015 |                  |         |
| File Name              | C:\Users\Niemcz\Desktop\Nowy folder\AB31-H1.fid\AB31-H1.fid\fid |                       |       |                      |             | Frequency (MHz) | 300.07      | Nucleus          | 1H      |
| Number of Transients   | 64                                                              | Original Points Count | 25304 | Points Count         | 32768       | Pulse Sequence  | s2pul       | Receiver Gain    | 6.00    |
| Solvent                | CHLOROFORM-d                                                    |                       |       | Spectrum Offset (Hz) | 2298.1584   | Spectrum Type   | STANDARD    | Sweep Width (Hz) | 5060.73 |
| Temperature (degree C) | AMBIENT TEMPERATURE                                             |                       |       |                      |             |                 |             |                  |         |

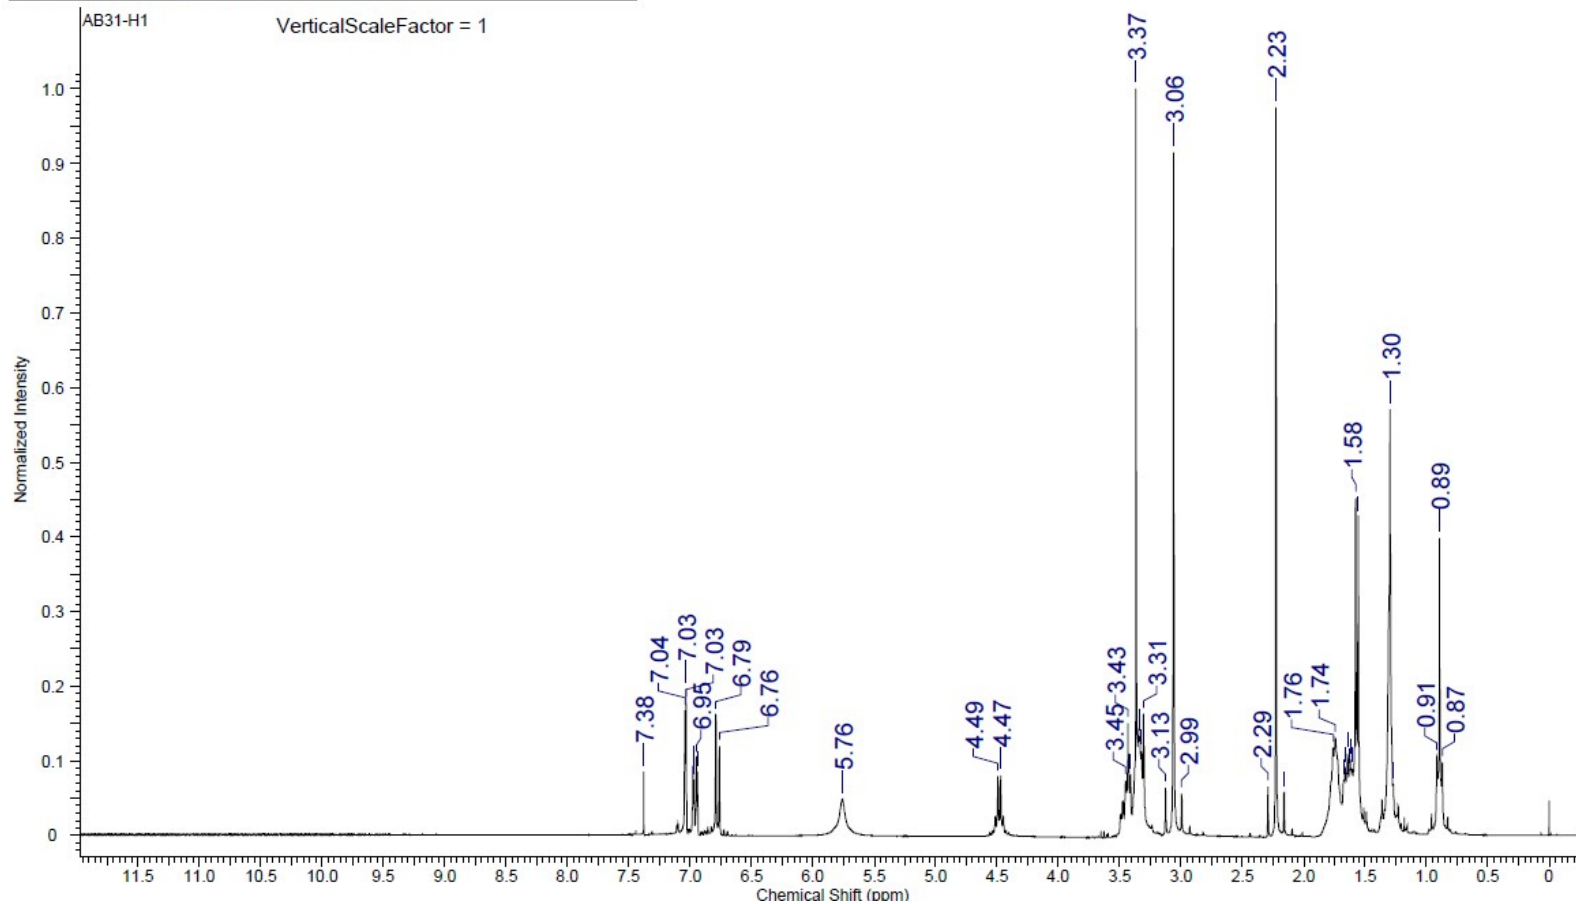

**Figure S9.**  $^1\text{H}$  NMR spectrum of 1-hexyl-1-methylpiperidinium 2-(4-chloro-2-methylphenoxy)propionate (**5**)

|                        |                                                                   |                      |          |                       |                 |                                            |             |
|------------------------|-------------------------------------------------------------------|----------------------|----------|-----------------------|-----------------|--------------------------------------------|-------------|
| Acquisition Time (sec) | 0.6400                                                            | Comment              | AB 31    | Date                  | Apr 17 2015     | Date Stamp                                 | Apr 17 2015 |
| File Name              | C:\Users\Niemcz\Desktop\Nowy folder\AB31-C13.fid\AB31-C13.fid\fid |                      |          |                       | Frequency (MHz) | 75.46                                      |             |
| Nucleus                | <sup>13</sup> C                                                   | Number of Transients | 2148     | Original Points Count | 12191           | Points Count                               | 16384       |
| Pulse Sequence         | s2pul                                                             | Receiver Gain        | 30.00    | Solvent               | CHLOROFORM-d    |                                            |             |
| Spectrum Offset (Hz)   | 7946.1660                                                         | Spectrum Type        | STANDARD | Sweep Width (Hz)      | 19047.62        | Temperature (degree C) AMBIENT TEMPERATURE |             |

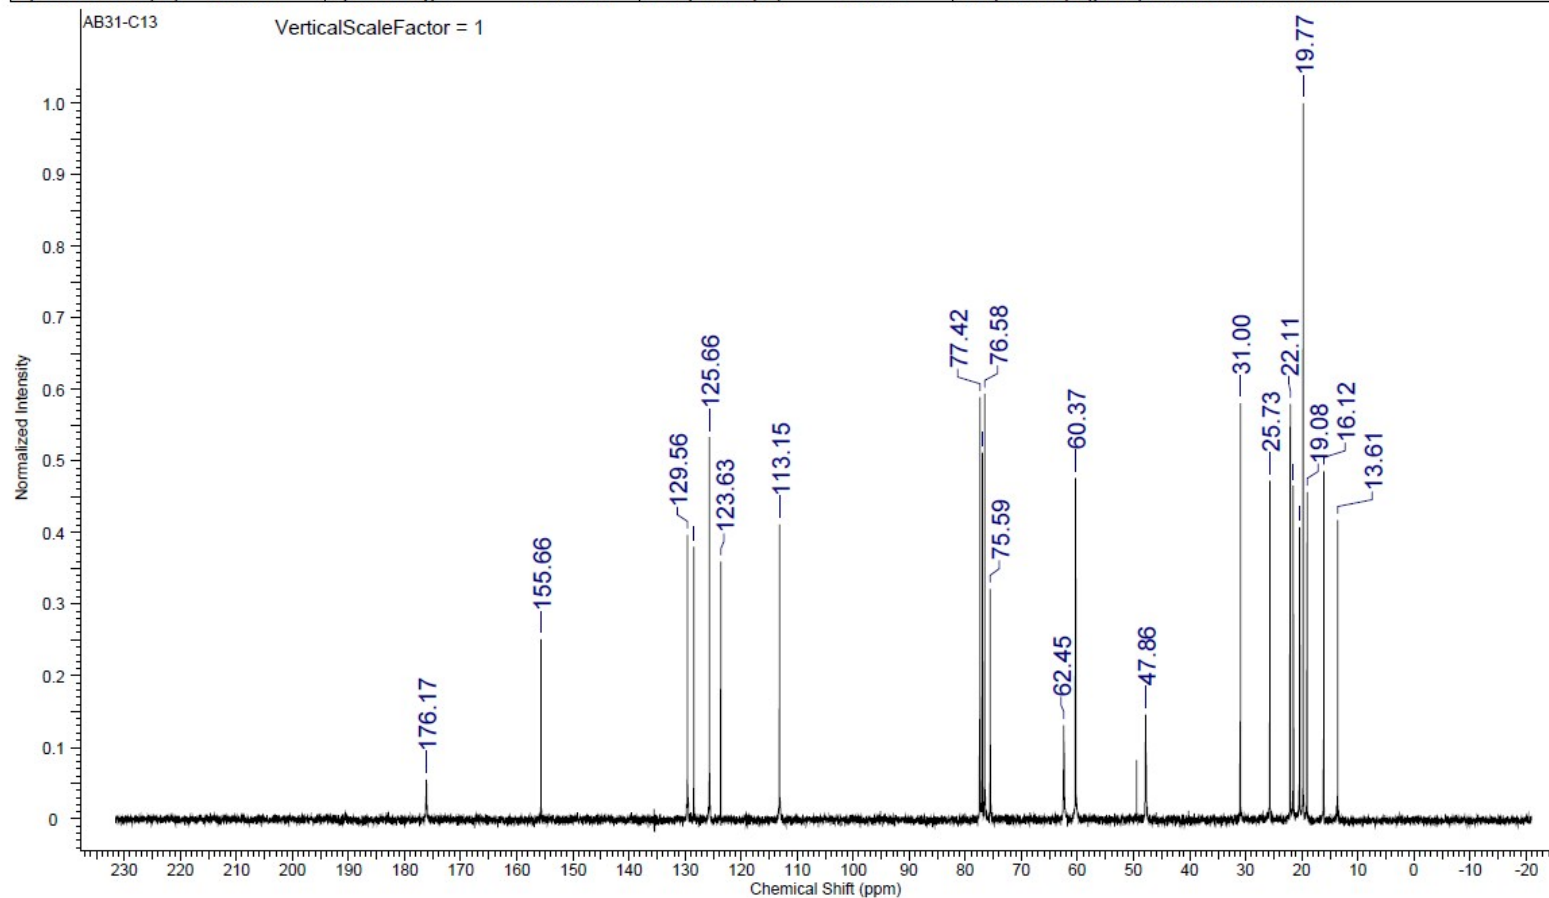

**Figure S10.** <sup>13</sup>C NMR spectrum 1-hexyl-1-methylpiperidinium 2-(4-chloro-2-methylphenoxy)propionate (**5**)



|                        |                                                             |                       |       |                      |             |                  |                |
|------------------------|-------------------------------------------------------------|-----------------------|-------|----------------------|-------------|------------------|----------------|
| Acquisition Time (sec) | 4.5003                                                      | Comment               | AB-32 | Date                 | Apr 24 2015 | Date Stamp       | Apr 24 2015    |
| File Name              | C:\Users\Niemcz\Desktop\Nowy folder\AB-32.fid\AB-32.fid\fid |                       |       | Frequency (MHz)      | 402.64      | Nucleus          | <sup>1</sup> H |
| Number of Transients   | 64                                                          | Original Points Count | 21148 | Points Count         | 32768       | Pulse Sequence   | s2pul          |
| Solvent                | CHLOROFORM-d                                                |                       |       | Spectrum Offset (Hz) | 2117.4438   | Spectrum Type    | STANDARD       |
| Temperature (degree C) | AMBIENT TEMPERATURE                                         |                       |       |                      |             | Receiver Gain    | 18.00          |
|                        |                                                             |                       |       |                      |             | Sweep Width (Hz) | 4699.25        |

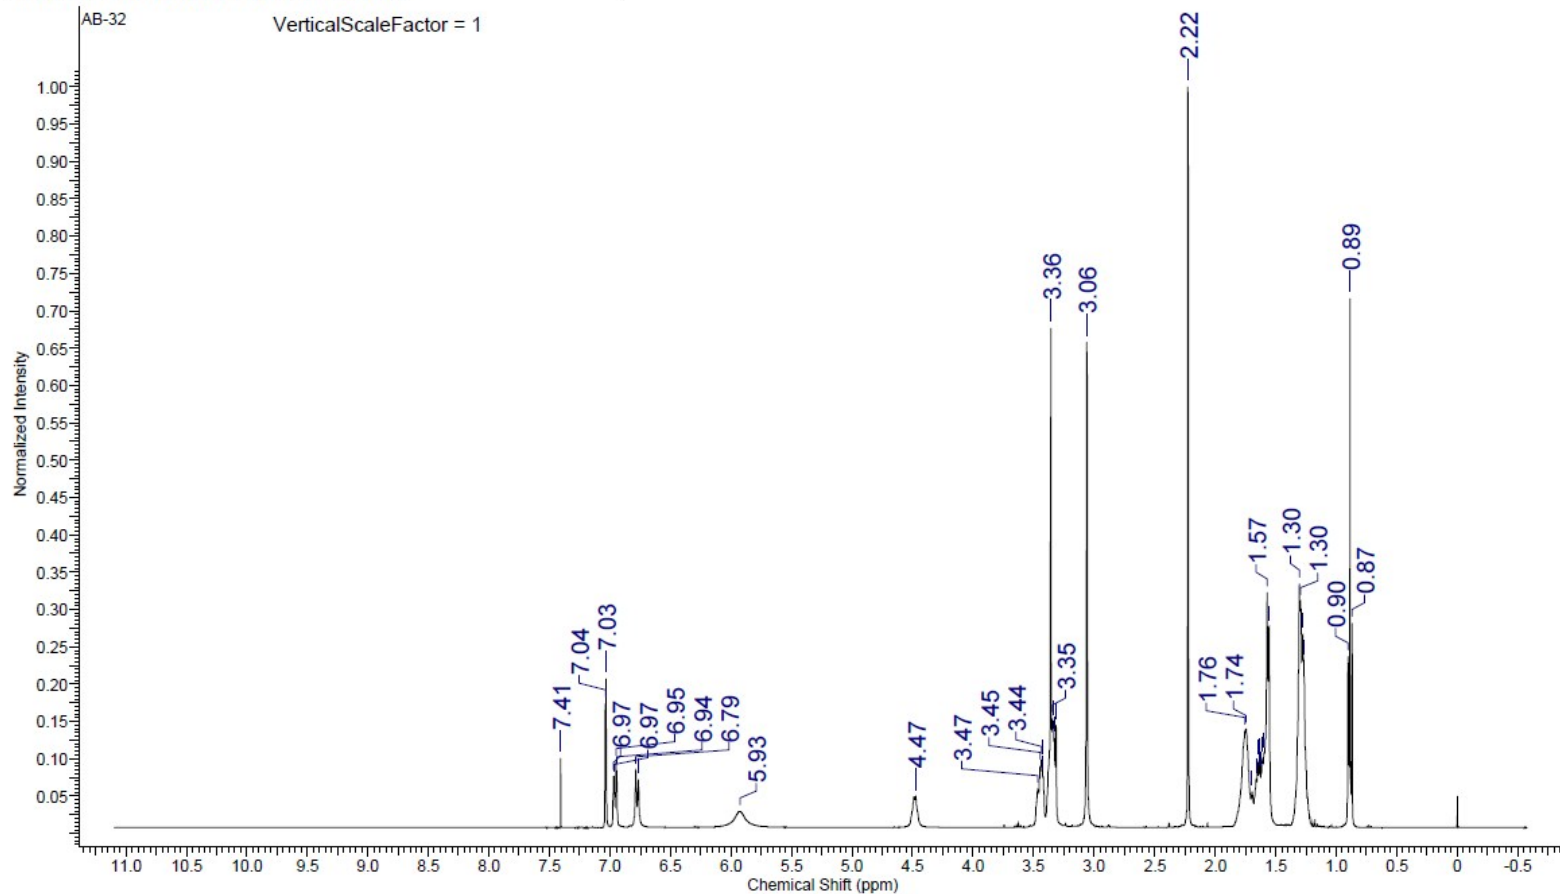

**Figure S11.** <sup>1</sup>H NMR spectrum of heptyl-1-methylpiperidinium 2-(4-chloro-2-methylphenoxy)propionate (**6**)



|                        |                                                                     |                      |          |                       |                 |                                            |             |
|------------------------|---------------------------------------------------------------------|----------------------|----------|-----------------------|-----------------|--------------------------------------------|-------------|
| Acquisition Time (sec) | 1.3010                                                              | Comment              | AB-32    | Date                  | Apr 24 2015     | Date Stamp                                 | Apr 24 2015 |
| File Name              | C:\Users\Niemcz\Desktop\Nowy folder\AB-32-c13.fid\AB-32-c13.fid\fid |                      |          |                       | Frequency (MHz) | 101.25                                     |             |
| Nucleus                | <sup>13</sup> C                                                     | Number of Transients | 1228     | Original Points Count | 28039           | Points Count                               | 32768       |
| Pulse Sequence         | s2pul                                                               | Receiver Gain        | 40.00    | Solvent               | CHLOROFORM-d    |                                            |             |
| Spectrum Offset (Hz)   | 9590.6719                                                           | Spectrum Type        | STANDARD | Sweep Width (Hz)      | 21551.72        | Temperature (degree C) AMBIENT TEMPERATURE |             |

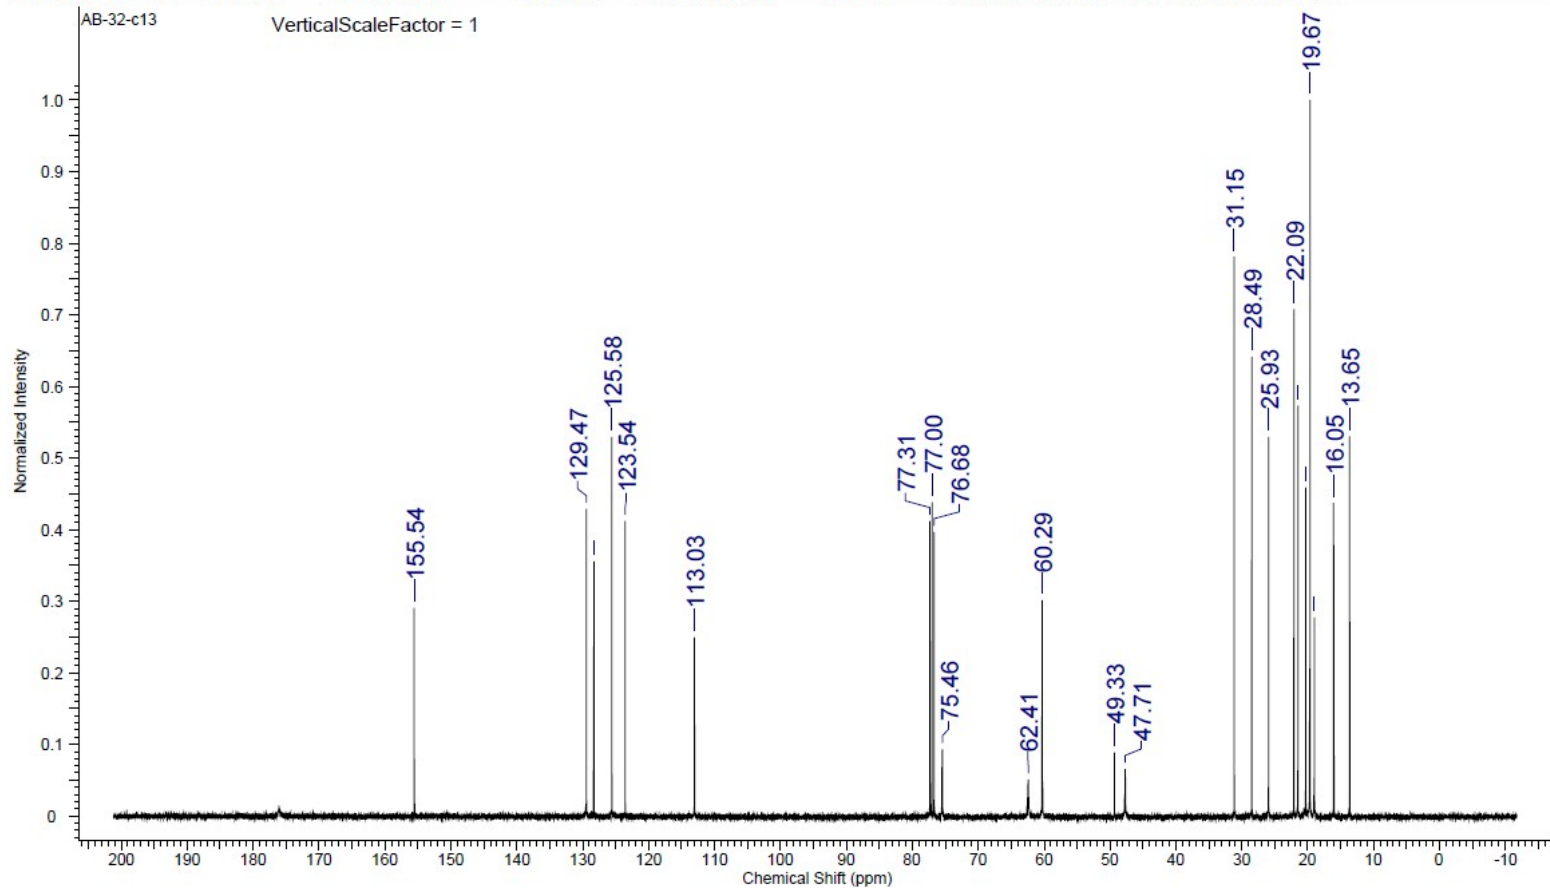

**Figure S12.** <sup>13</sup>C NMR spectrum of heptyl-1-methylpiperidinium 2-(4-chloro-2-methylphenoxy)propionate (**6**)

|                        |                                                             |                       |       |                      |             |                 |             |                  |         |
|------------------------|-------------------------------------------------------------|-----------------------|-------|----------------------|-------------|-----------------|-------------|------------------|---------|
| Acquisition Time (sec) | 5.5000                                                      | Comment               | AB-33 | Date                 | Apr 24 2015 | Date Stamp      | Apr 24 2015 |                  |         |
| File Name              | C:\Users\Niemcz\Desktop\Nowy folder\AB-33.fid\AB-33.fid\fid |                       |       |                      |             | Frequency (MHz) | 402.64      | Nucleus          | 1H      |
| Number of Transients   | 40                                                          | Original Points Count | 27067 | Points Count         | 32768       | Pulse Sequence  | s2pul       | Receiver Gain    | 18.00   |
| Solvent                | CHLOROFORM-d                                                |                       |       | Spectrum Offset (Hz) | 2138.4082   | Spectrum Type   | STANDARD    | Sweep Width (Hz) | 4921.26 |
| Temperature (degree C) | AMBIENT TEMPERATURE                                         |                       |       |                      |             |                 |             |                  |         |

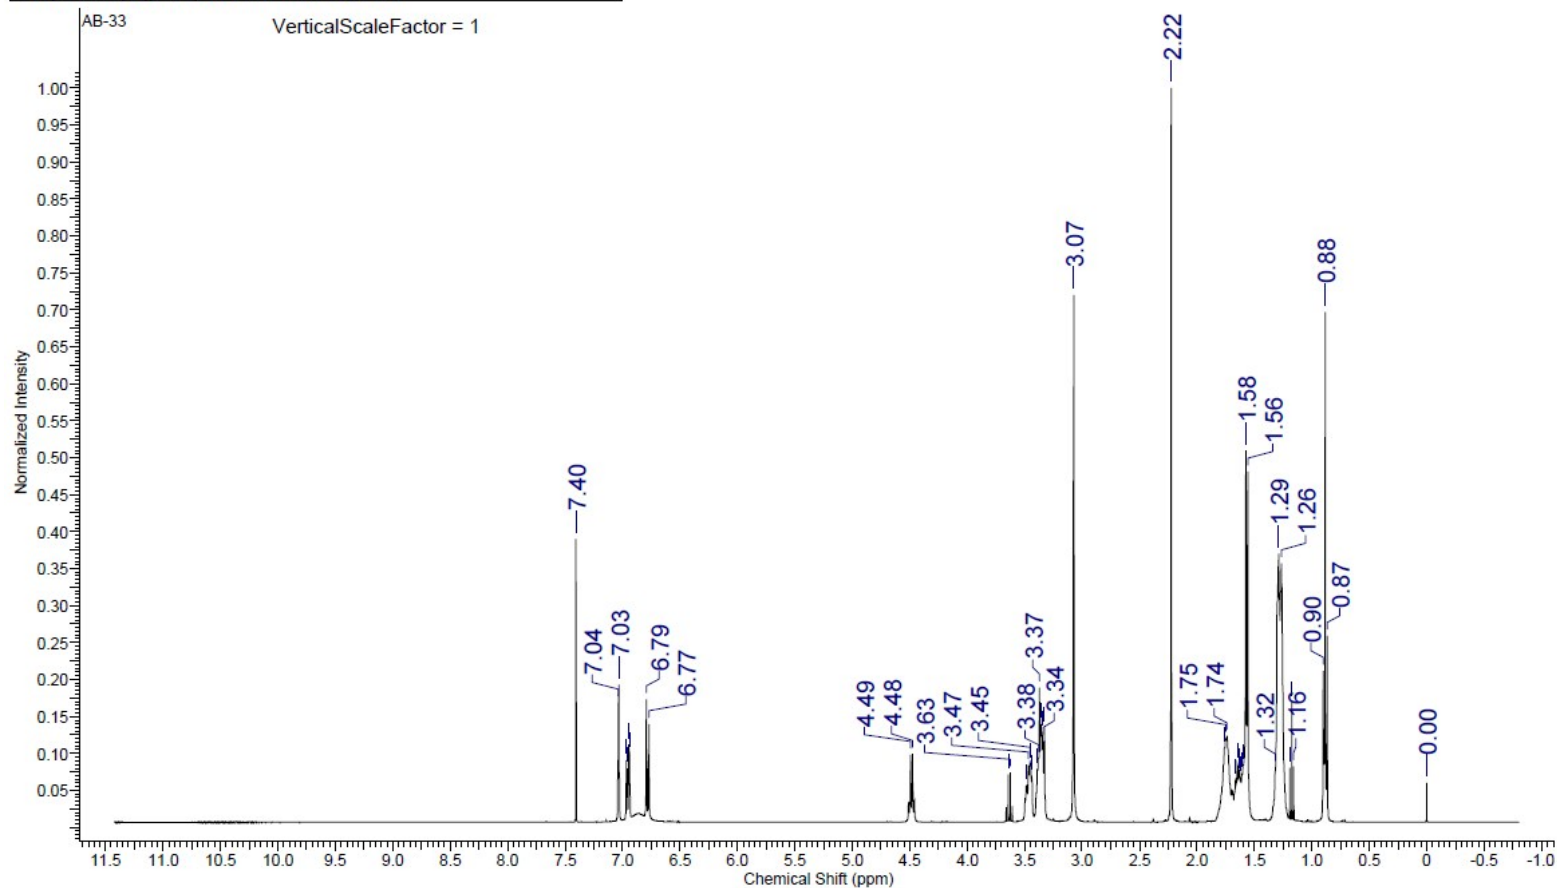

**Figure S13.** <sup>1</sup>H NMR spectrum of 1-methyl-1-octylpiperidinium 2-(4-chloro-2-methylphenoxy)propionate (7)

|                        |                                                                     |                      |          |                       |                 |                                            |             |
|------------------------|---------------------------------------------------------------------|----------------------|----------|-----------------------|-----------------|--------------------------------------------|-------------|
| Acquisition Time (sec) | 1.5010                                                              | Comment              | AB-33    | Date                  | Apr 24 2015     | Date Stamp                                 | Apr 24 2015 |
| File Name              | C:\Users\Niemcz\Desktop\Nowy folder\AB-33-C13.fid\AB-33-C13.fid\fid |                      |          |                       | Frequency (MHz) | 101.25                                     |             |
| Nucleus                | 13C                                                                 | Number of Transients | 688      | Original Points Count | 32349           | Points Count                               | 32768       |
| Pulse Sequence         | s2pul                                                               | Receiver Gain        | 44.00    | Solvent               | CHLOROFORM-d    |                                            |             |
| Spectrum Offset (Hz)   | 9591.3301                                                           | Spectrum Type        | STANDARD | Sweep Width (Hz)      | 21551.72        | Temperature (degree C) AMBIENT TEMPERATURE |             |

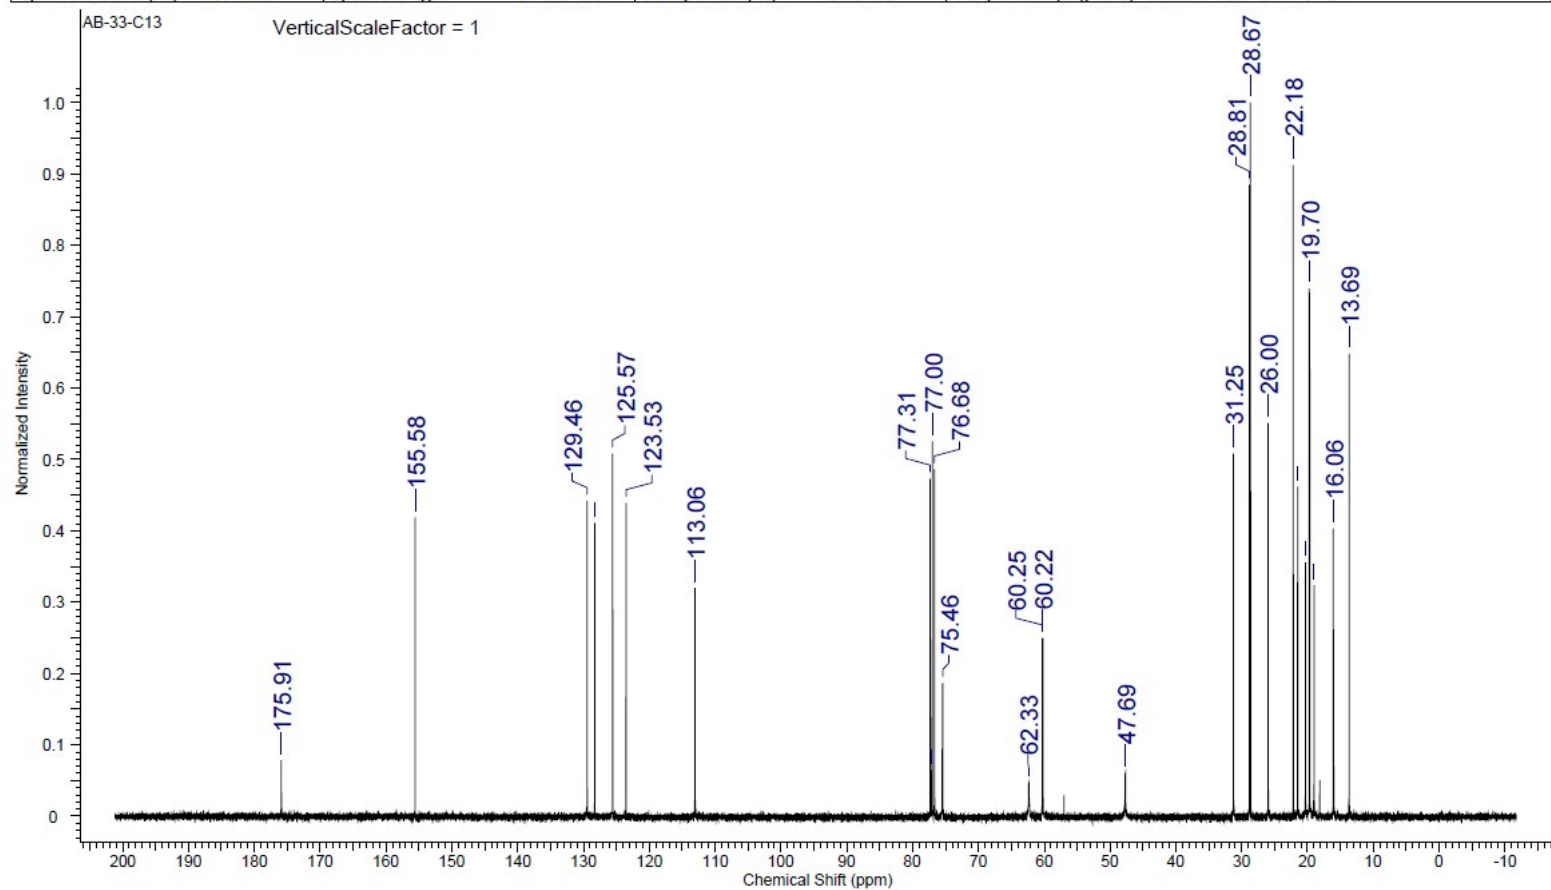

**Figure S14.**  $^{13}\text{C}$  NMR spectrum of 1-methyl-1-octylpiperidinium 2-(4-chloro-2-methylphenoxy)propionate (7)

|                        |                                                                   |                      |          |                       |              |                                            |             |
|------------------------|-------------------------------------------------------------------|----------------------|----------|-----------------------|--------------|--------------------------------------------|-------------|
| Acquisition Time (sec) | 6.0000                                                            | Comment              | AB 34    | Date                  | Apr 27 2015  | Date Stamp                                 | Apr 27 2015 |
| File Name              | C:\Users\Niemcz\Desktop\Nowy folder\AB-34-H1.fid\AB-34-H1.fid\fid |                      |          | Frequency (MHz)       |              |                                            | 402.64      |
| Nucleus                | <sup>1</sup> H                                                    | Number of Transients | 64       | Original Points Count | 31915        | Points Count                               | 32768       |
| Pulse Sequence         | s2pul                                                             | Receiver Gain        | 22.00    | Solvent               | CHLOROFORM-d |                                            |             |
| Spectrum Offset (Hz)   | 2254.4048                                                         | Spectrum Type        | STANDARD | Sweep Width (Hz)      | 5319.15      | Temperature (degree C) AMBIENT TEMPERATURE |             |

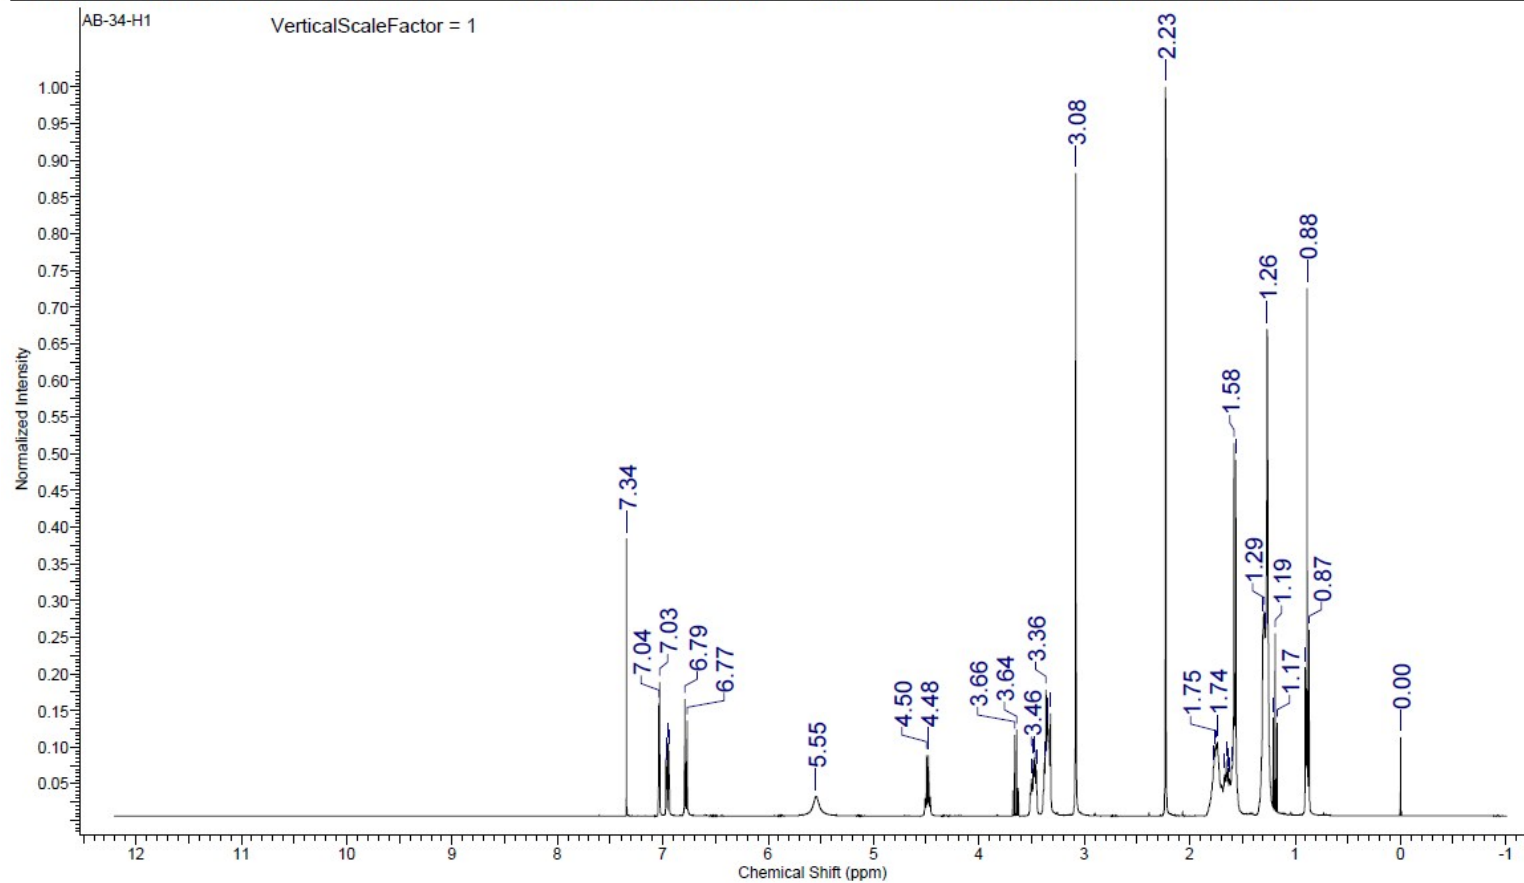

**Figure S15.** <sup>1</sup>H NMR spectrum of 1-methyl-1-nonylpiperidinium 2-(4-chloro-2-methylphenoxy)propionate (**8**)

|                        |                                                                     |                      |          |                       |              |                        |                     |
|------------------------|---------------------------------------------------------------------|----------------------|----------|-----------------------|--------------|------------------------|---------------------|
| Acquisition Time (sec) | 1.3010                                                              | Comment              | AB 34    | Date                  | Apr 27 2015  | Date Stamp             | Apr 27 2015         |
| File Name              | C:\Users\Niemcz\Desktop\Nowy folder\AB-34-C13.fid\AB-34-C13.fid.fid |                      |          |                       |              | Frequency (MHz)        | 101.25              |
| Nucleus                | <sup>13</sup> C                                                     | Number of Transients | 1004     | Original Points Count | 31274        | Points Count           | 32768               |
| Pulse Sequence         | s2pul                                                               | Receiver Gain        | 40.00    | Solvent               | CHLOROFORM-d |                        |                     |
| Spectrum Offset (Hz)   | 10869.5557                                                          | Spectrum Type        | STANDARD | Sweep Width (Hz)      | 24038.46     | Temperature (degree C) | AMBIENT TEMPERATURE |

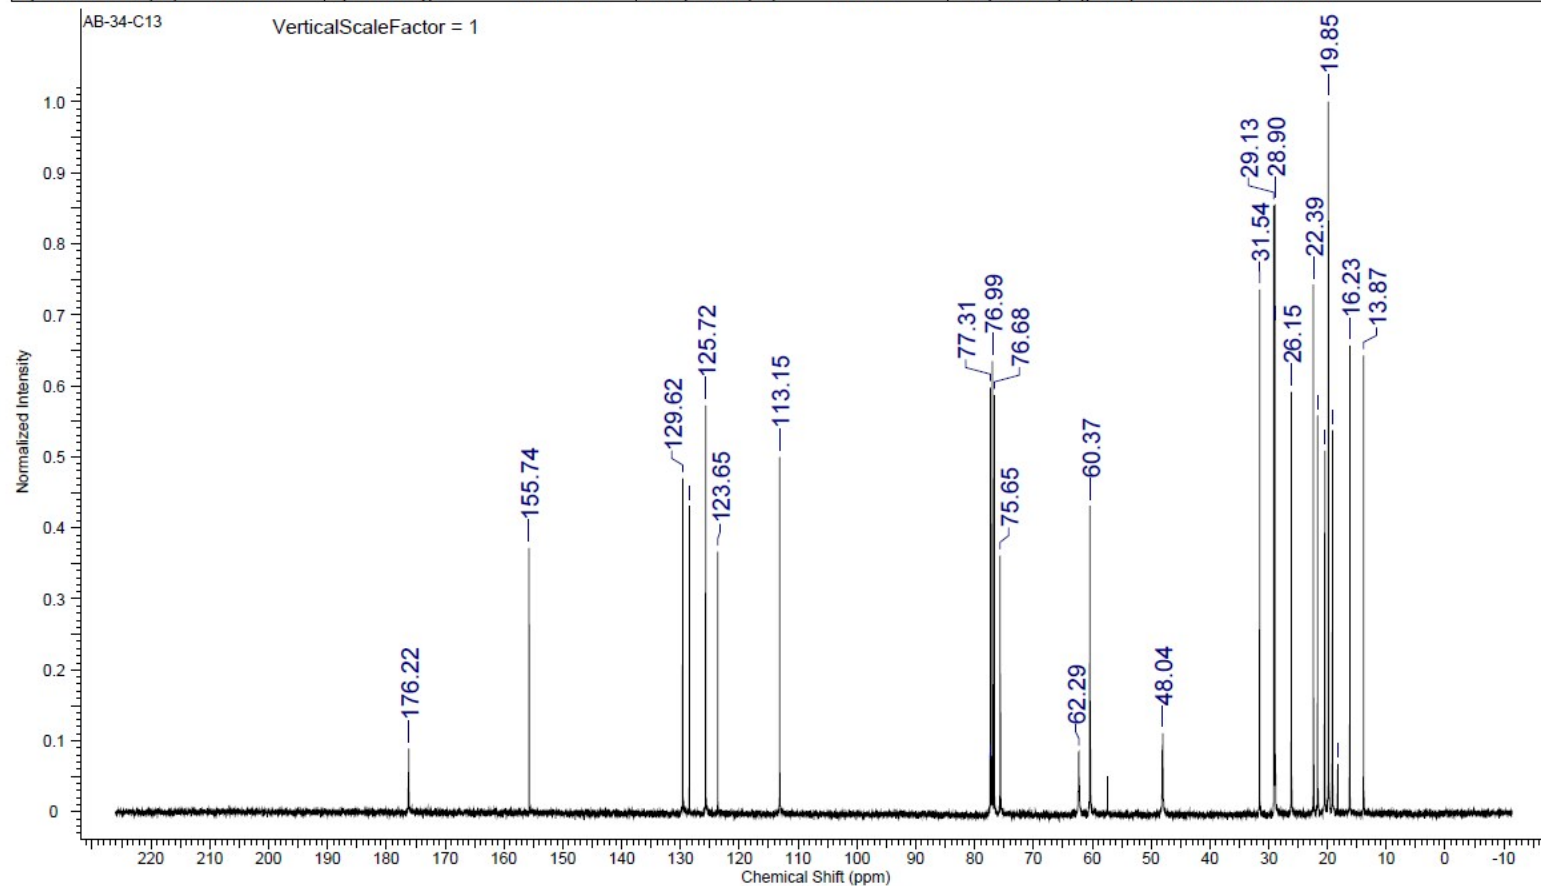

**Figure S16.** <sup>13</sup>C NMR spectrum of 1-methyl-1-nonylpiperidinium 2-(4-chloro-2-methylphenoxy)propionate (**8**)

|                        |                                                                 |                       |       |                      |             |                 |             |                  |         |
|------------------------|-----------------------------------------------------------------|-----------------------|-------|----------------------|-------------|-----------------|-------------|------------------|---------|
| Acquisition Time (sec) | 5.0001                                                          | Comment               | AB 35 | Date                 | Apr 17 2015 | Date Stamp      | Apr 17 2015 |                  |         |
| File Name              | C:\Users\Niemcz\Desktop\Nowy folder\AB35-H1.fid\AB35-H1.fid\fid |                       |       |                      |             | Frequency (MHz) | 300.07      | Nucleus          | 1H      |
| Number of Transients   | 64                                                              | Original Points Count | 25304 | Points Count         | 32768       | Pulse Sequence  | s2pul       | Receiver Gain    | 6.00    |
| Solvent                | CHLOROFORM-d                                                    |                       |       | Spectrum Offset (Hz) | 2298.9307   | Spectrum Type   | STANDARD    | Sweep Width (Hz) | 5060.73 |
| Temperature (degree C) | AMBIENT TEMPERATURE                                             |                       |       |                      |             |                 |             |                  |         |

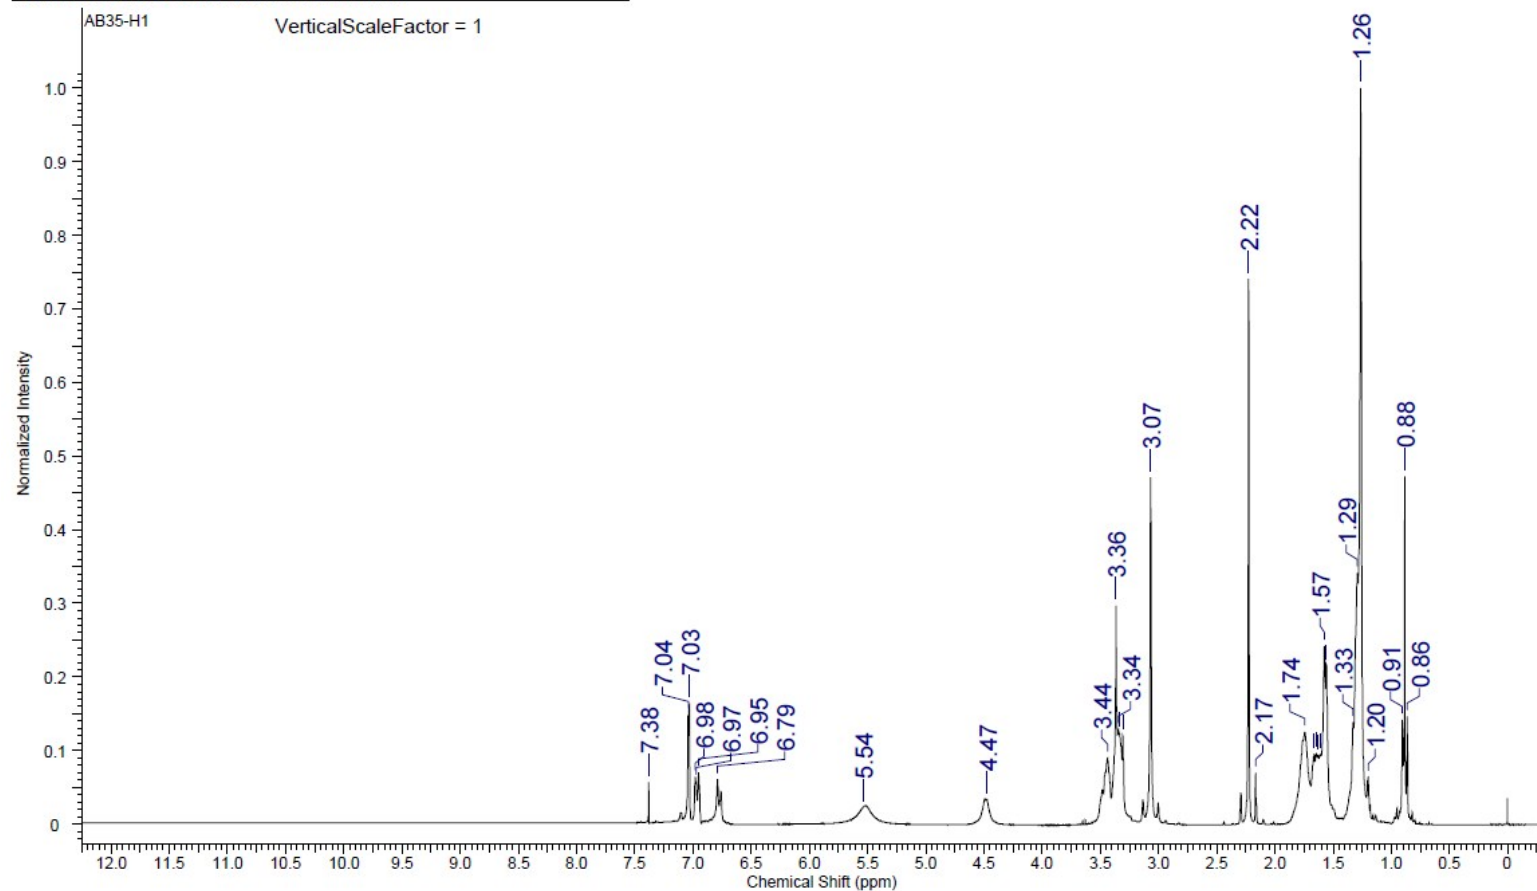

**Figure S17.**  $^1\text{H}$  NMR spectrum of 1-decyl-1-methylpiperidinium 2-(4-chloro-2-methylphenoxy)propionate (**9**)

|                        |                                                                   |                      |          |                       |                 |                        |                     |
|------------------------|-------------------------------------------------------------------|----------------------|----------|-----------------------|-----------------|------------------------|---------------------|
| Acquisition Time (sec) | 0.6400                                                            | Comment              | AB 35    | Date                  | Apr 17 2015     | Date Stamp             | Apr 17 2015         |
| File Name              | C:\Users\Niemcz\Desktop\Nowy folder\AB35-C13.fid\AB35-C13.fid\fid |                      |          |                       | Frequency (MHz) | 75.46                  |                     |
| Nucleus                | <sup>13</sup> C                                                   | Number of Transients | 1988     | Original Points Count | 12191           | Points Count           | 16384               |
| Pulse Sequence         | s2pul                                                             | Receiver Gain        | 30.00    | Solvent               | CHLOROFORM-d    |                        |                     |
| Spectrum Offset (Hz)   | 7946.1660                                                         | Spectrum Type        | STANDARD | Sweep Width (Hz)      | 19047.62        | Temperature (degree C) | AMBIENT TEMPERATURE |

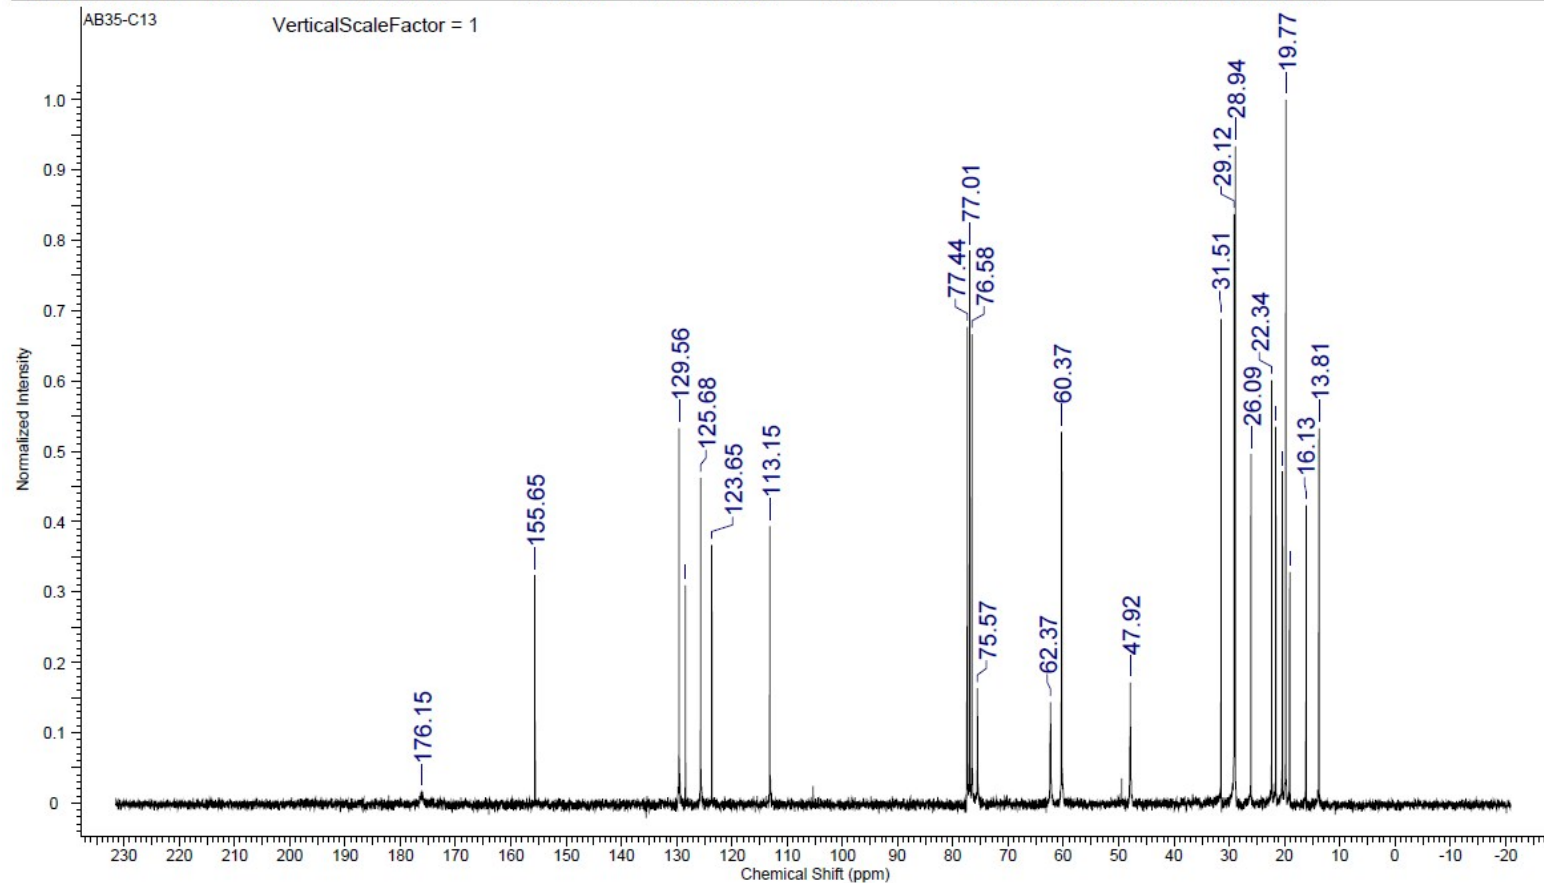

**Figure S18.** <sup>13</sup>C NMR spectrum of 1-decyl-1-methylpiperidinium 2-(4-chloro-2-methylphenoxy)propionate (**9**)



|                        |                                                                   |                      |          |                       |                 |                                            |             |
|------------------------|-------------------------------------------------------------------|----------------------|----------|-----------------------|-----------------|--------------------------------------------|-------------|
| Acquisition Time (sec) | 6.4999                                                            | Comment              | AB 36    | Date                  | Apr 27 2015     | Date Stamp                                 | Apr 27 2015 |
| File Name              | C:\Users\Niemcz\Desktop\Nowy folder\AB-36-H1.fid\AB-36-H1.fid\fid |                      |          |                       | Frequency (MHz) | 402.64                                     |             |
| Nucleus                | <sup>1</sup> H                                                    | Number of Transients | 64       | Original Points Count | 34574           | Points Count                               | 65536       |
| Pulse Sequence         | s2pul                                                             | Receiver Gain        | 22.00    | Solvent               | CHLOROFORM-d    |                                            |             |
| Spectrum Offset (Hz)   | 2270.6377                                                         | Spectrum Type        | STANDARD | Sweep Width (Hz)      | 5319.15         | Temperature (degree C) AMBIENT TEMPERATURE |             |

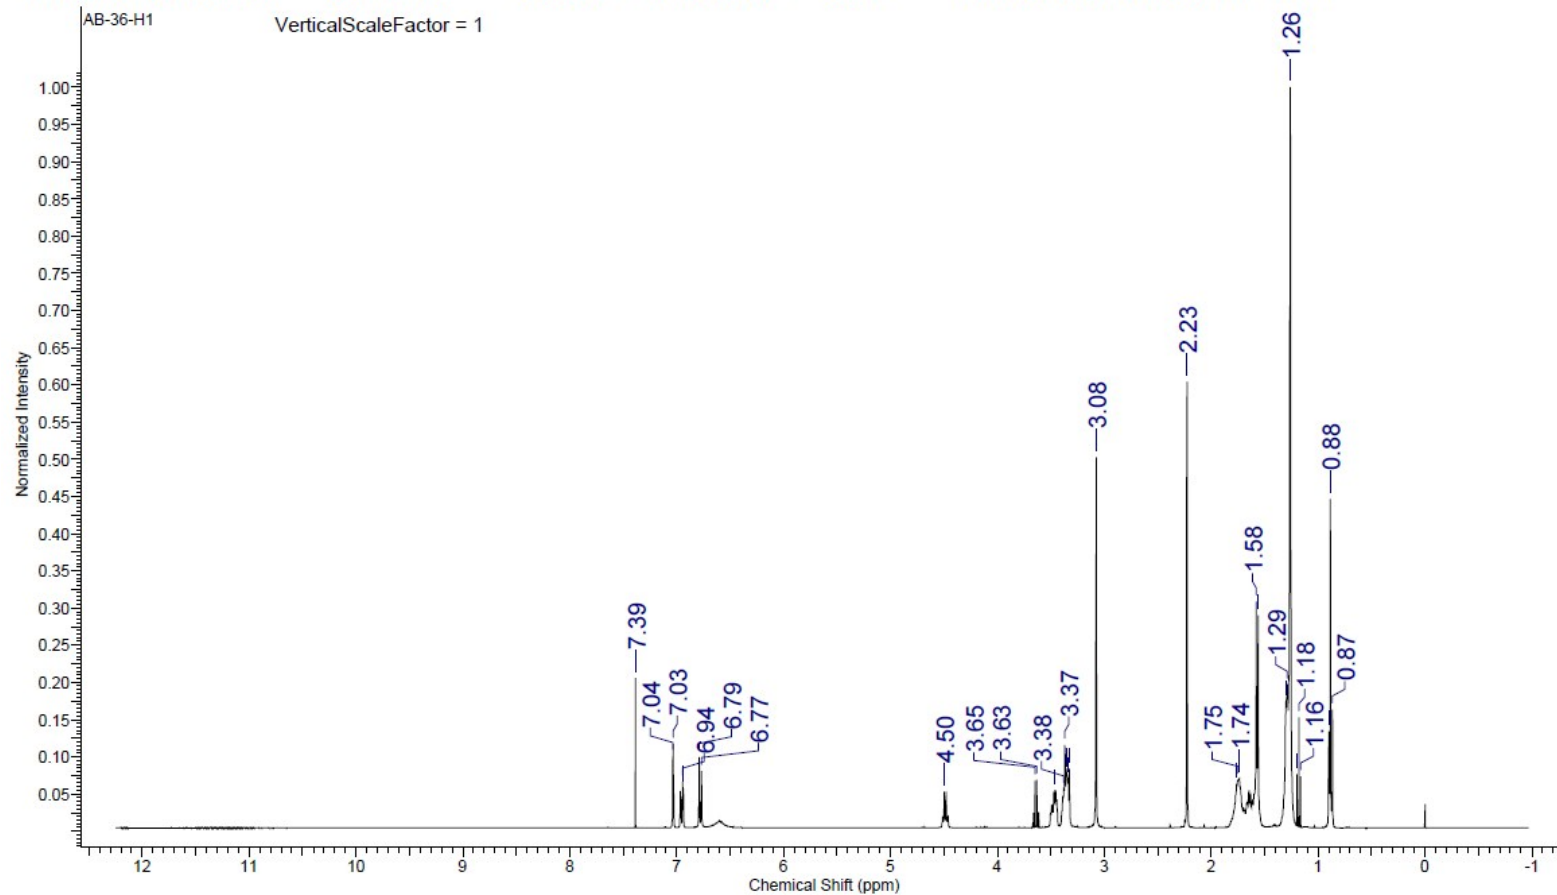

**Figure S19.** <sup>1</sup>H NMR spectrum of 1-methyl-1-undecylpiperidinium 2-(4-chloro-2-methylphenoxy)propionate (**10**)



|                        |                                                                     |                      |          |                       |                 |                                            |             |
|------------------------|---------------------------------------------------------------------|----------------------|----------|-----------------------|-----------------|--------------------------------------------|-------------|
| Acquisition Time (sec) | 1.3010                                                              | Comment              | AB 36    | Date                  | Apr 27 2015     | Date Stamp                                 | Apr 27 2015 |
| File Name              | C:\Users\Niemcz\Desktop\Nowy folder\AB-36-C13.fid\AB-36-C13.fid\fid |                      |          |                       | Frequency (MHz) | 101.25                                     |             |
| Nucleus                | <sup>13</sup> C                                                     | Number of Transients | 1212     | Original Points Count | 31274           | Points Count                               | 32768       |
| Pulse Sequence         | s2pul                                                               | Receiver Gain        | 40.00    | Solvent               | CHLOROFORM-d    |                                            |             |
| Spectrum Offset (Hz)   | 10862.2207                                                          | Spectrum Type        | STANDARD | Sweep Width (Hz)      | 24038.46        | Temperature (degree C) AMBIENT TEMPERATURE |             |

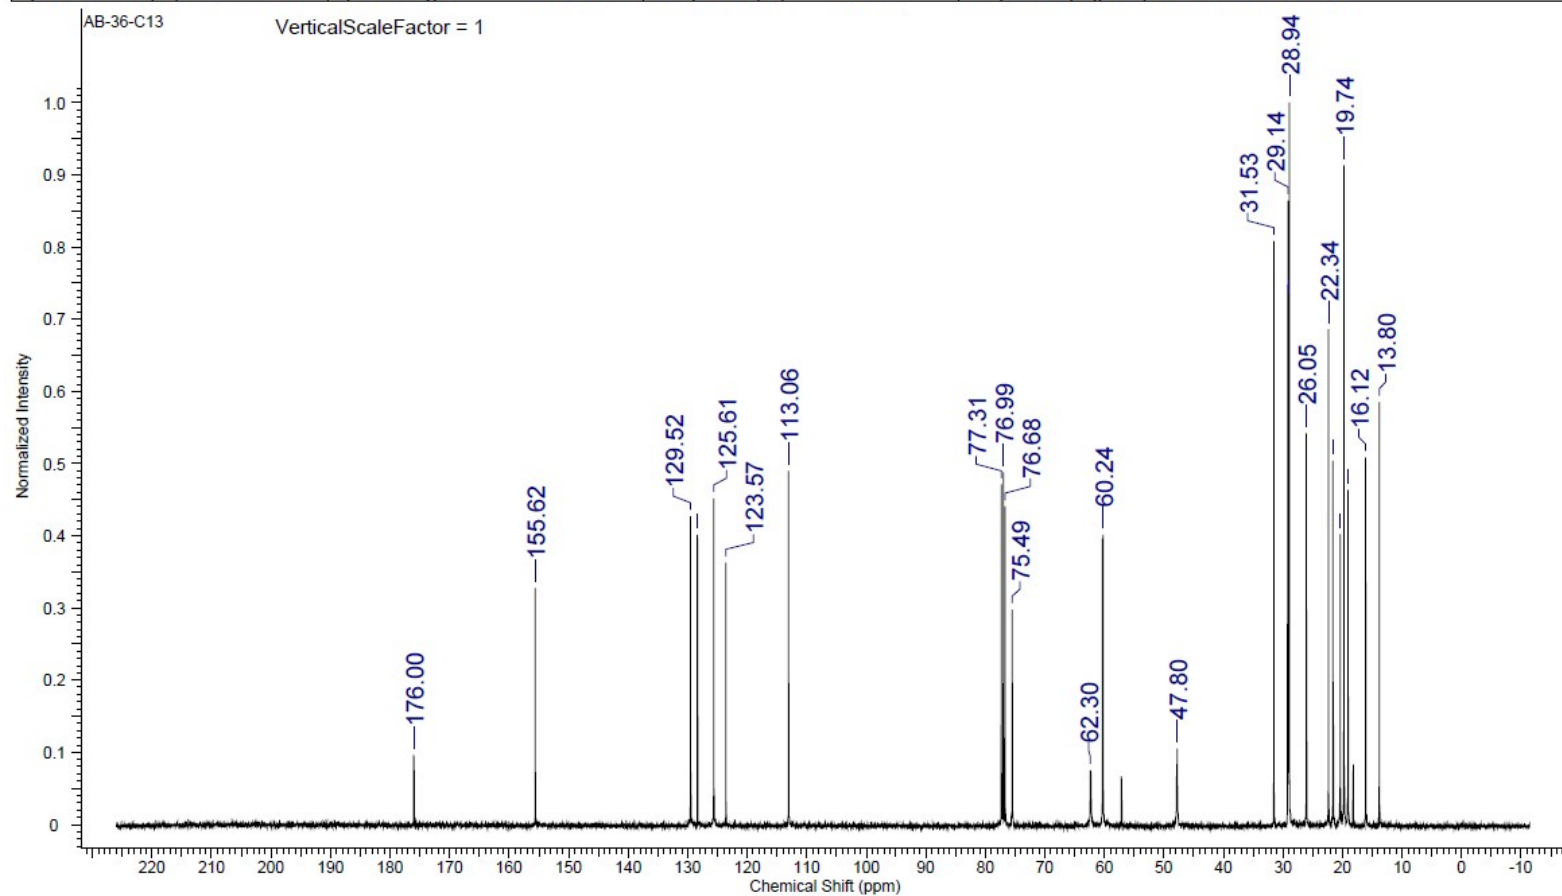

**Figure S20.** <sup>13</sup>C NMR spectrum of 1-methyl-1-undecylpiperidinium 2-(4-chloro-2-methylphenoxy)propionate (**10**)

|                        |                                                                   |                      |          |                       |                 |                                            |             |
|------------------------|-------------------------------------------------------------------|----------------------|----------|-----------------------|-----------------|--------------------------------------------|-------------|
| Acquisition Time (sec) | 6.4999                                                            | Comment              | AB 37    | Date                  | Apr 27 2015     | Date Stamp                                 | Apr 27 2015 |
| File Name              | C:\Users\Niemcz\Desktop\Nowy folder\AB-37-H1.fid\AB-37-H1.fid\fid |                      |          |                       | Frequency (MHz) | 402.64                                     |             |
| Nucleus                | <sup>1</sup> H                                                    | Number of Transients | 64       | Original Points Count | 34574           | Points Count                               | 65536       |
| Pulse Sequence         | s2pul                                                             | Receiver Gain        | 22.00    | Solvent               | CHLOROFORM-d    |                                            |             |
| Spectrum Offset (Hz)   | 2253.2686                                                         | Spectrum Type        | STANDARD | Sweep Width (Hz)      | 5319.15         | Temperature (degree C) AMBIENT TEMPERATURE |             |

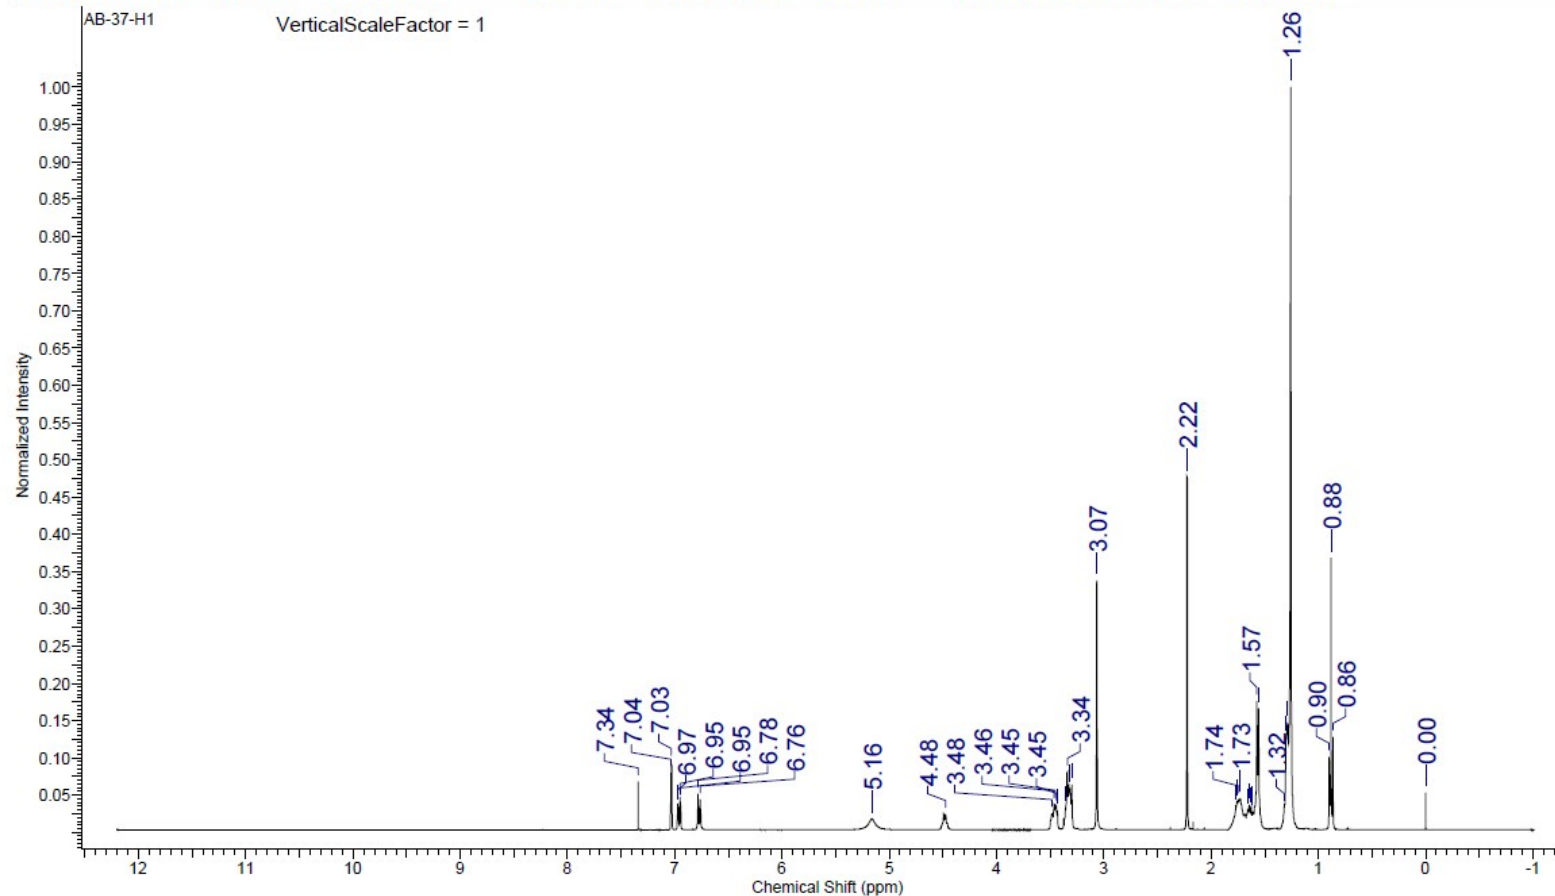

**Figure S21.** <sup>1</sup>H NMR spectrum of 1-dodecyl-1-methylpiperidinium 2-(4-chloro-2-methylphenoxy)propionate (**11**)

|                        |                                                                     |                      |          |                       |                 |                        |                     |
|------------------------|---------------------------------------------------------------------|----------------------|----------|-----------------------|-----------------|------------------------|---------------------|
| Acquisition Time (sec) | 1.3010                                                              | Comment              | AB 37    | Date                  | Apr 27 2015     | Date Stamp             | Apr 27 2015         |
| File Name              | C:\Users\Niemcz\Desktop\Nowy folder\AB-37-C13.fid\AB-37-C13.fid\fid |                      |          |                       | Frequency (MHz) | 101.25                 |                     |
| Nucleus                | <sup>13</sup> C                                                     | Number of Transients | 1864     | Original Points Count | 31274           | Points Count           | 32768               |
| Pulse Sequence         | s2pul                                                               | Receiver Gain        | 40.00    | Solvent               | CHLOROFORM-d    |                        |                     |
| Spectrum Offset (Hz)   | 10869.5557                                                          | Spectrum Type        | STANDARD | Sweep Width (Hz)      | 24038.46        | Temperature (degree C) | AMBIENT TEMPERATURE |

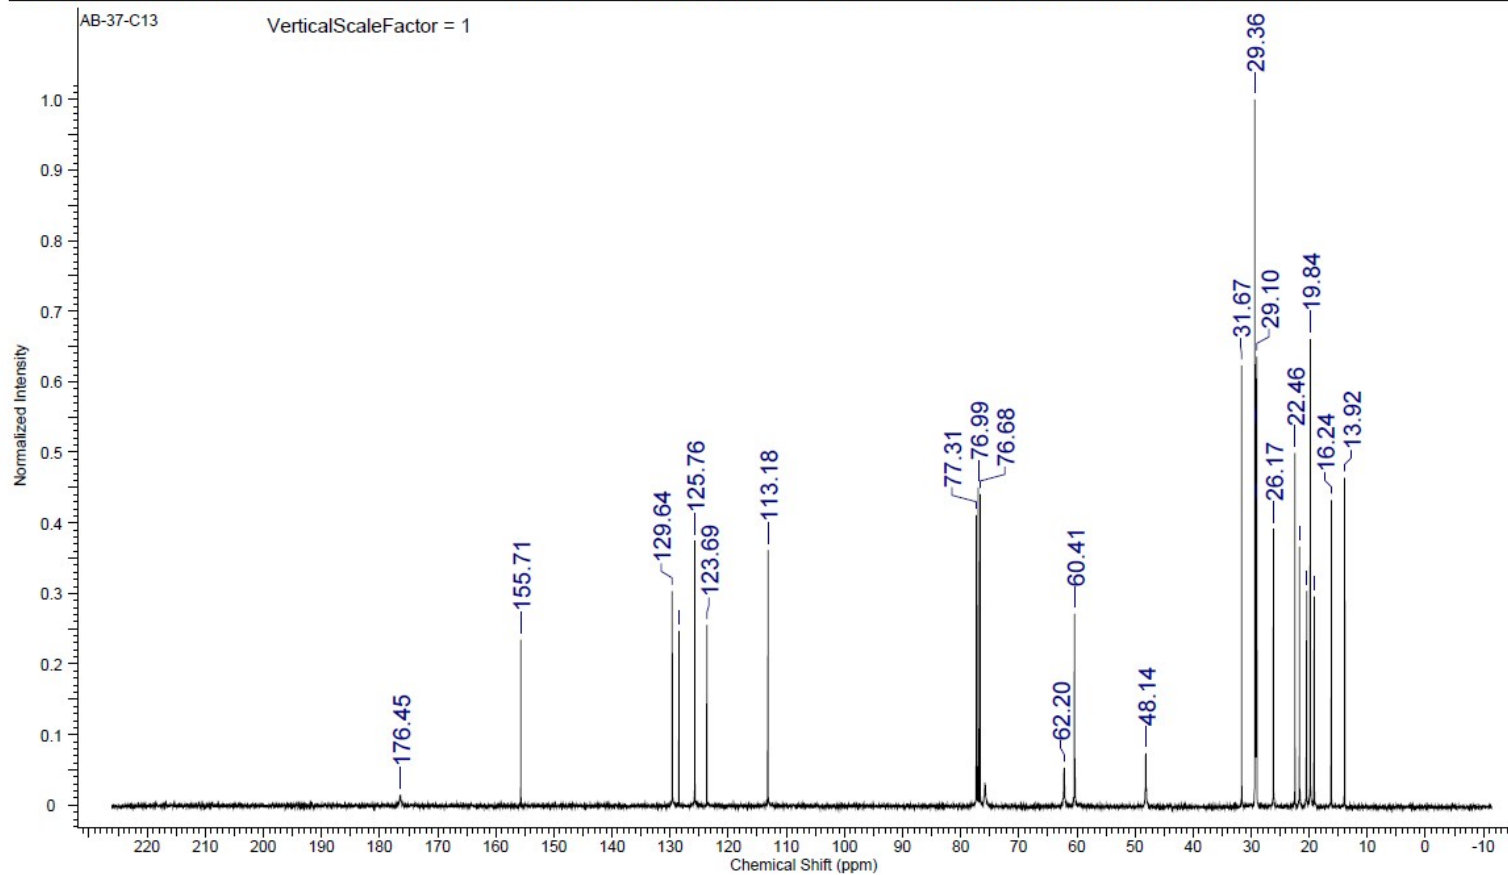

**Figure S22.** <sup>13</sup>C NMR spectrum of 1-dodecyl-1-methylpiperidinium 2-(4-chloro-2-methylphenoxy)propionate (**11**)

|                        |                                                         |                       |       |                      |             |                 |             |                  |         |
|------------------------|---------------------------------------------------------|-----------------------|-------|----------------------|-------------|-----------------|-------------|------------------|---------|
| Acquisition Time (sec) | 4.4999                                                  | Comment               | AB-38 | Date                 | Apr 28 2015 | Date Stamp      | Apr 28 2015 |                  |         |
| File Name              | C:\Users\Niemcz\Desktop\Nowy folder\AB-38.fid\AB-38.fid |                       |       |                      |             | Frequency (MHz) | 402.64      | Nucleus          | 1H      |
| Number of Transients   | 64                                                      | Original Points Count | 21469 | Points Count         | 32768       | Pulse Sequence  | s2pul       | Receiver Gain    | 18.00   |
| Solvent                | CHLOROFORM-d                                            |                       |       | Spectrum Offset (Hz) | 2095.8267   | Spectrum Type   | STANDARD    | Sweep Width (Hz) | 4770.99 |
| Temperature (degree C) | AMBIENT TEMPERATURE                                     |                       |       |                      |             |                 |             |                  |         |

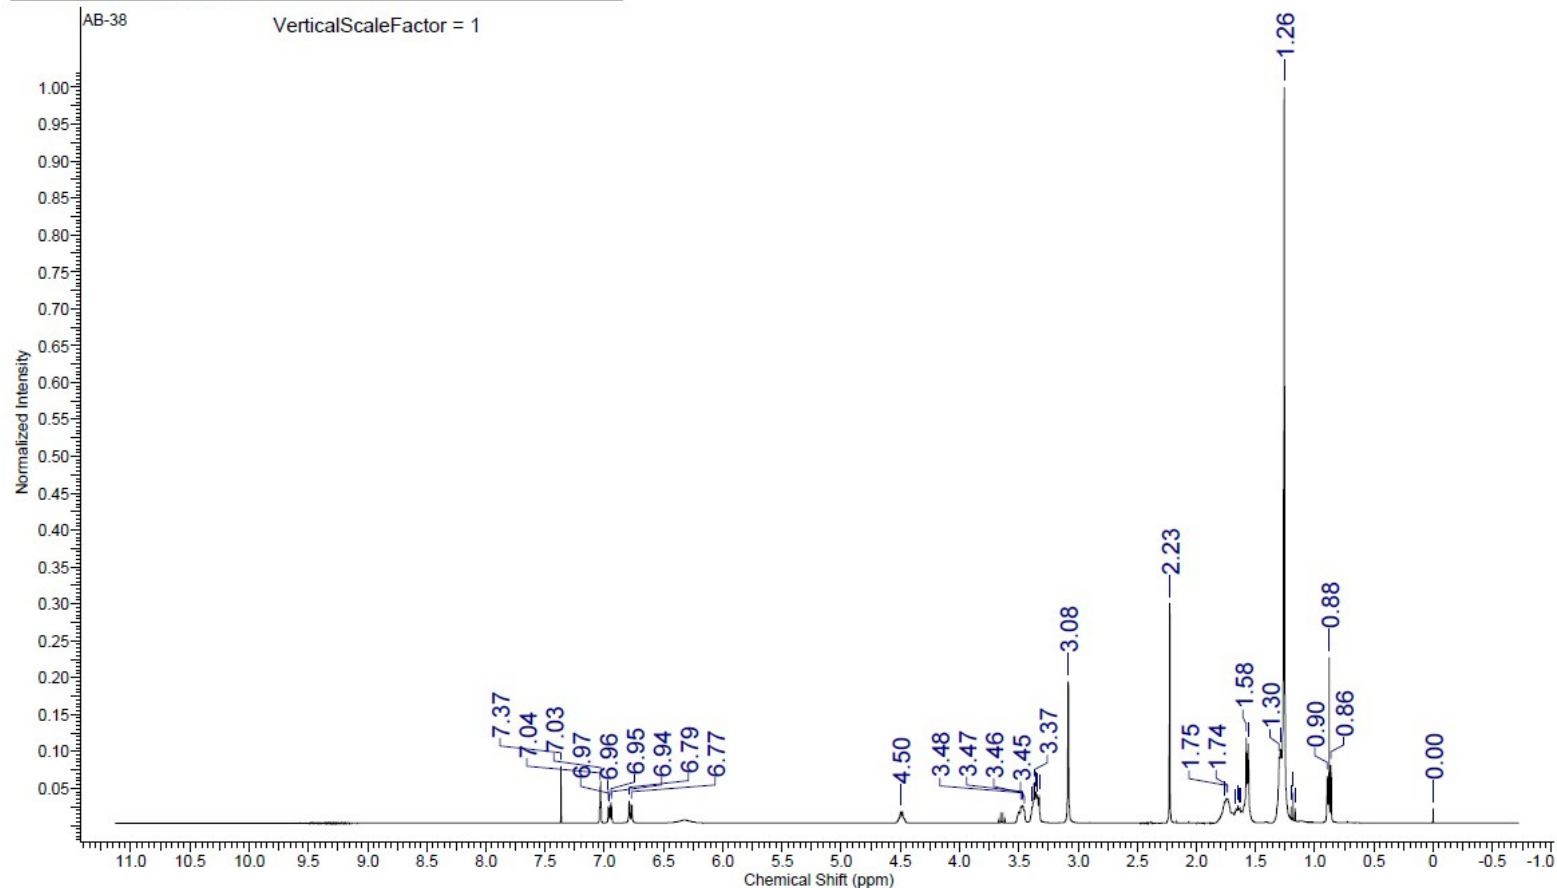

**Figure S23.** <sup>1</sup>H NMR spectrum of 1-methyl-1-tetradecylpiperidinium 2-(4-chloro-2-methylphenoxy)propionate (**12**)

|                        |                                                                 |                      |          |                       |                 |                        |                     |
|------------------------|-----------------------------------------------------------------|----------------------|----------|-----------------------|-----------------|------------------------|---------------------|
| Acquisition Time (sec) | 1.3010                                                          | Comment              | AB-38    | Date                  | Apr 28 2015     | Date Stamp             | Apr 28 2015         |
| File Name              | C:\Users\Niemcz\Desktop\Nowy folder\AB-38-c13.fid\AB-38-c13.fid |                      |          |                       | Frequency (MHz) | 101.25                 |                     |
| Nucleus                | <sup>13</sup> C                                                 | Number of Transients | 608      | Original Points Count | 28039           | Points Count           | 32768               |
| Pulse Sequence         | s2pul                                                           | Receiver Gain        | 40.00    | Solvent               | CHLOROFORM-d    |                        |                     |
| Spectrum Offset (Hz)   | 9600.2080                                                       | Spectrum Type        | STANDARD | Sweep Width (Hz)      | 21551.72        | Temperature (degree C) | AMBIENT TEMPERATURE |

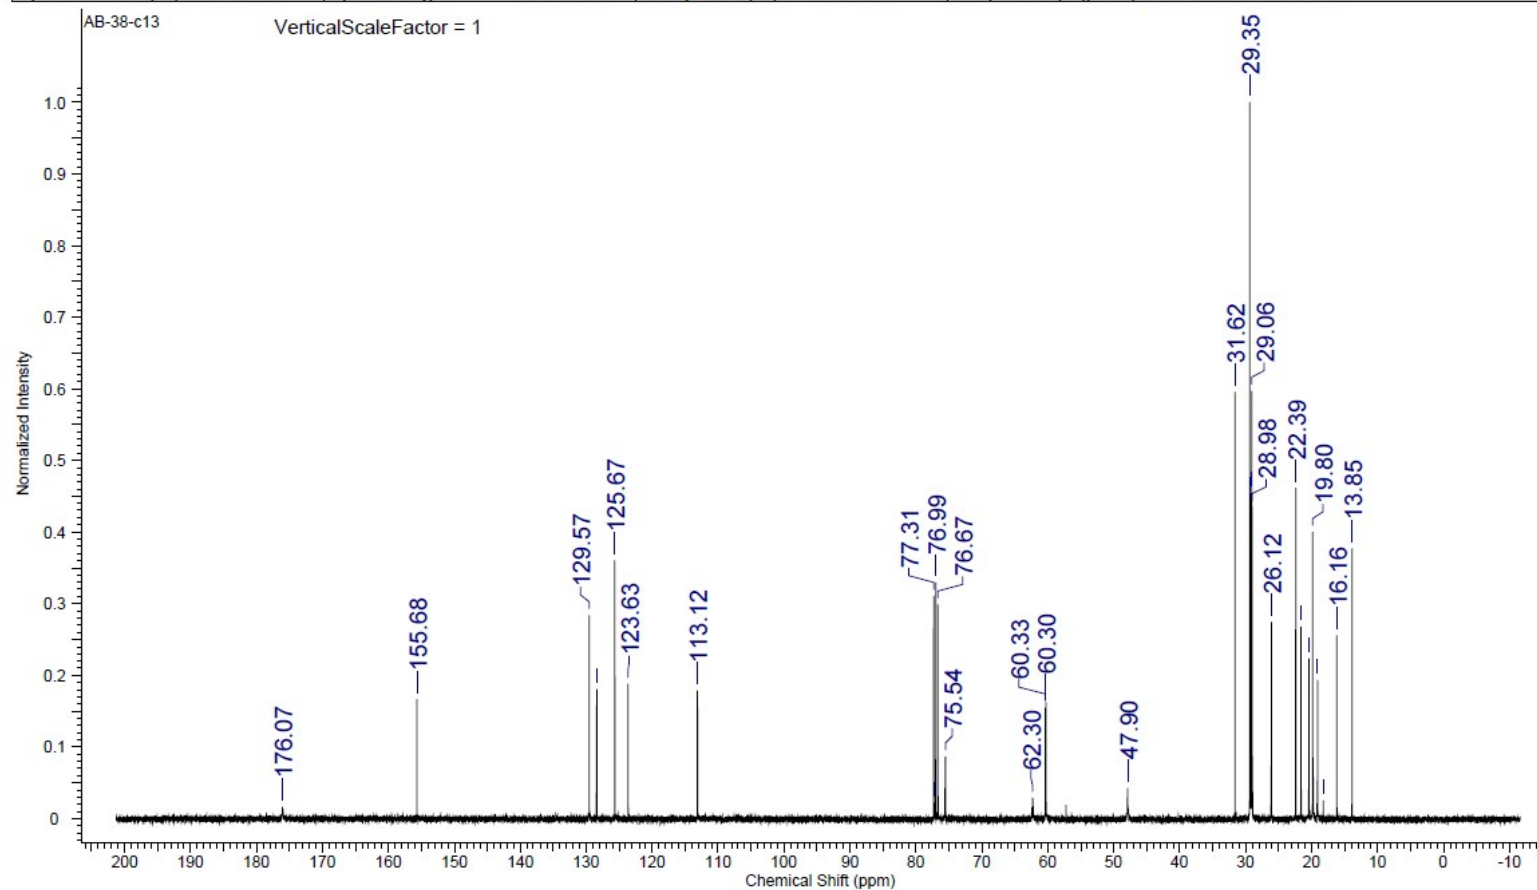

**Figure S24.** <sup>13</sup>C NMR spectrum of 1-methyl-1-tetradecylpiperidinium 2-(4-chloro-2-methylphenoxy)propionate (**12**)

|                        |                                                                 |                      |              |                                            |                 |              |             |
|------------------------|-----------------------------------------------------------------|----------------------|--------------|--------------------------------------------|-----------------|--------------|-------------|
| Acquisition Time (sec) | 4.5000                                                          | Comment              | AB 39        | Date                                       | Apr 26 2015     | Date Stamp   | Apr 26 2015 |
| File Name              | C:\Users\Niemcz\Desktop\Nowy folder\AB39-H1.fid\AB39-H1.fid\fid |                      |              |                                            | Frequency (MHz) | 300.07       |             |
| Nucleus                | <sup>1</sup> H                                                  | Number of Transients | 64           | Original Points Count                      | 18711           | Points Count | 32768       |
| Pulse Sequence         | s2pul                                                           | Solvent              | CHLOROFORM-d | Spectrum Offset (Hz) 1658.7224             |                 |              |             |
| Spectrum Type          | STANDARD                                                        | Sweep Width (Hz)     | 4158.00      | Temperature (degree C) AMBIENT TEMPERATURE |                 |              |             |

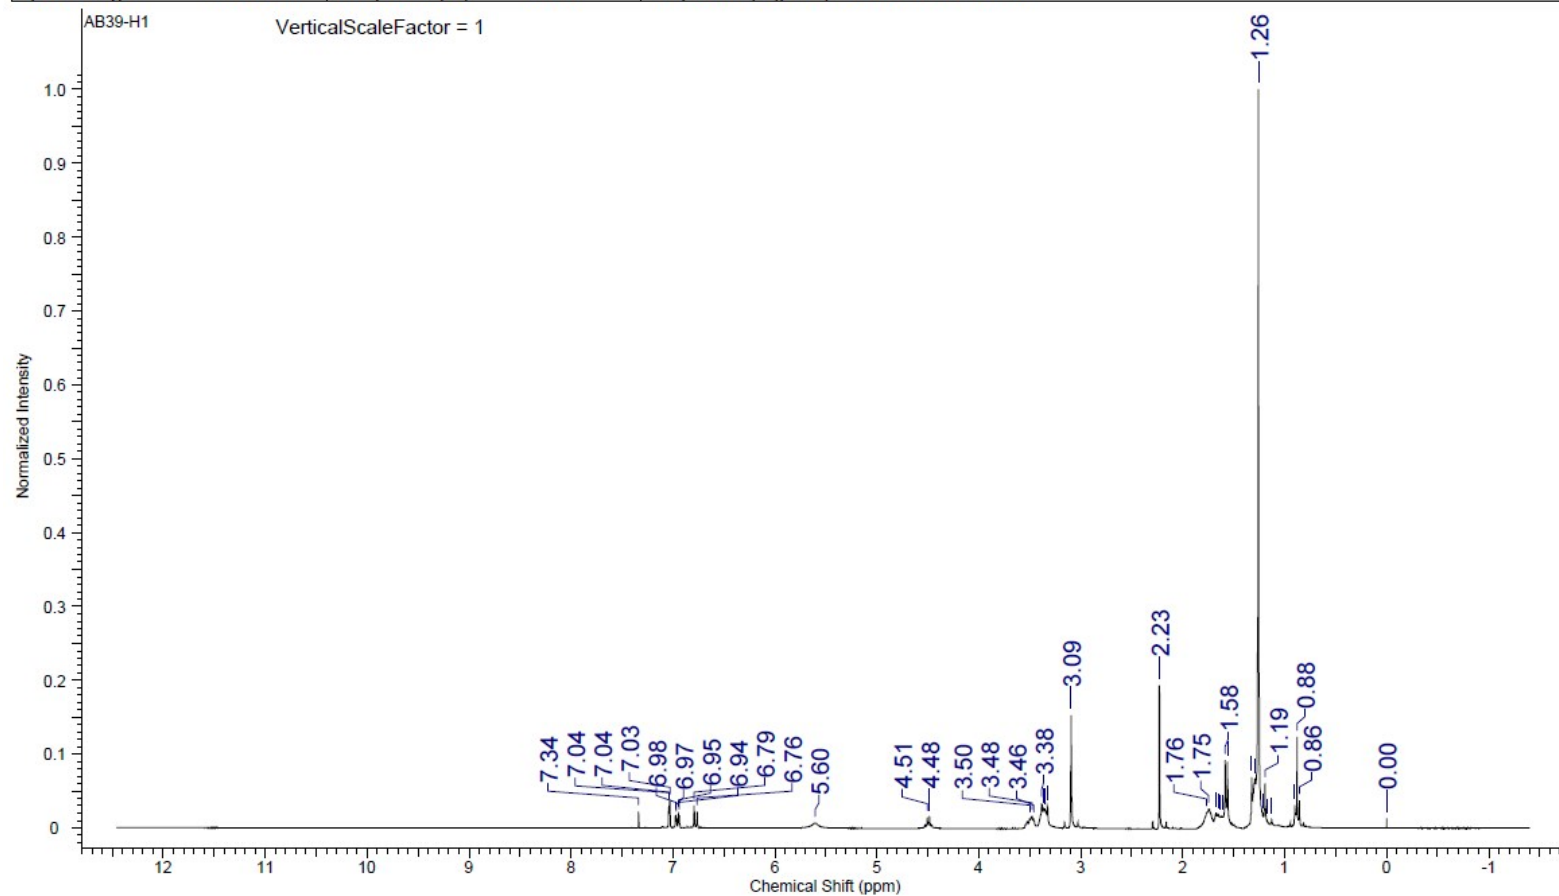

**Figure S25.** <sup>1</sup>H NMR spectrum of 1-hexadecyl-1-methylpiperidinium 2-(4-chloro-2-methylphenoxy)propionate (**13**)

|                        |                                                                   |                      |          |                       |              |                                            |             |
|------------------------|-------------------------------------------------------------------|----------------------|----------|-----------------------|--------------|--------------------------------------------|-------------|
| Acquisition Time (sec) | 0.6400                                                            | Comment              | AB 39    | Date                  | Apr 26 2015  | Date Stamp                                 | Apr 26 2015 |
| File Name              | C:\Users\Niemcz\Desktop\Nowy folder\AB39-C13.fid\AB39-C13.fid\fid |                      |          |                       |              | Frequency (MHz)                            | 75.46       |
| Nucleus                | <sup>13</sup> C                                                   | Number of Transients | 3088     | Original Points Count | 10257        | Points Count                               | 16384       |
| Pulse Sequence         | s2pul                                                             | Receiver Gain        | 34.00    | Solvent               | CHLOROFORM-d |                                            |             |
| Spectrum Offset (Hz)   | 7202.2539                                                         | Spectrum Type        | STANDARD | Sweep Width (Hz)      | 16025.64     | Temperature (degree C) AMBIENT TEMPERATURE |             |

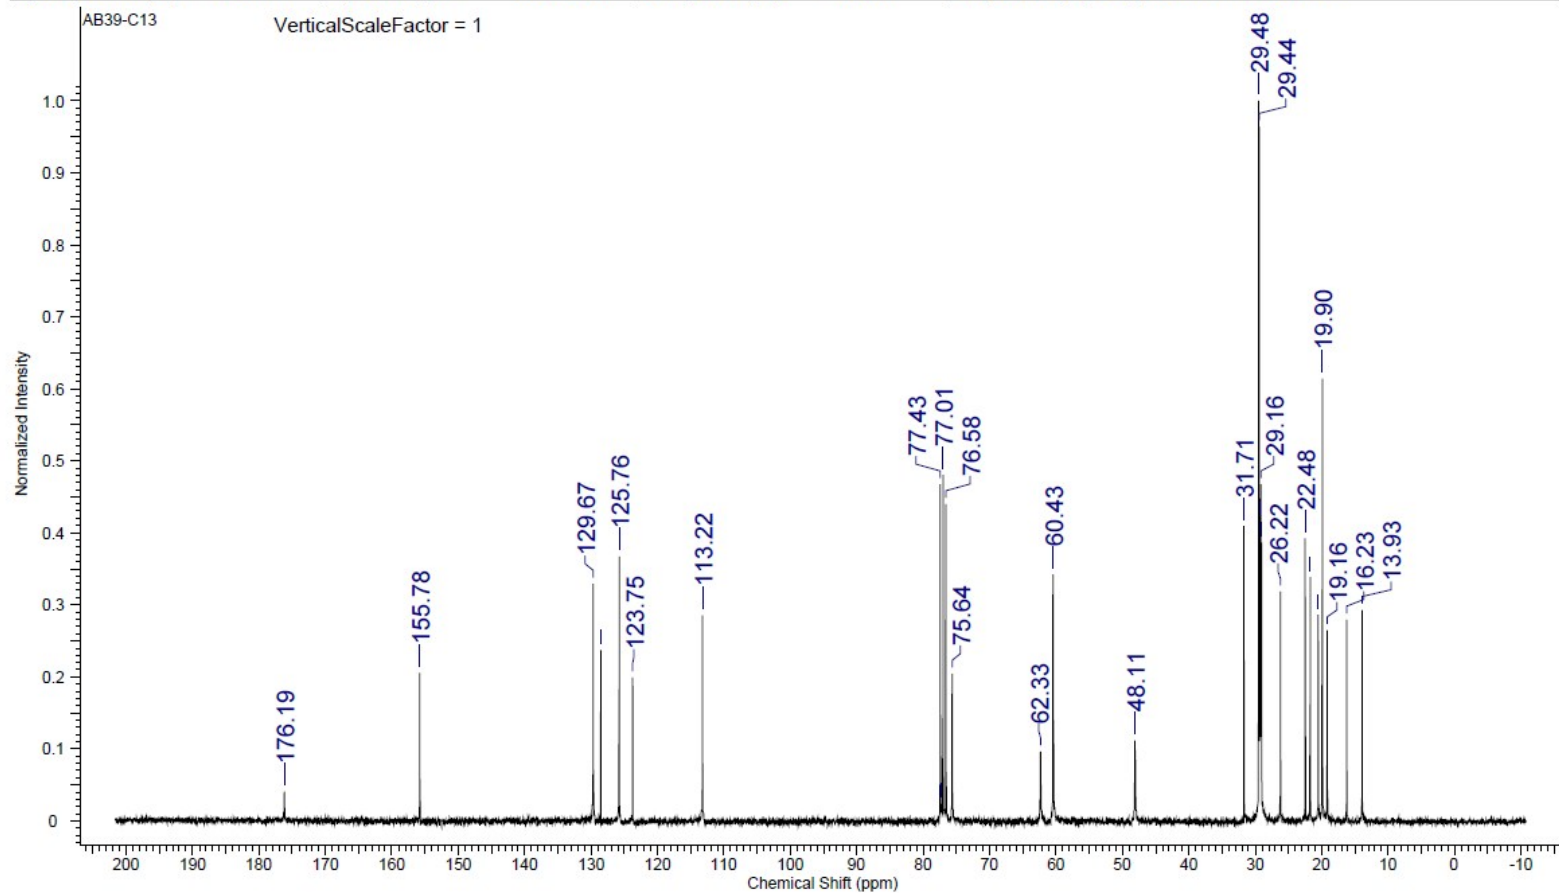

**Figure S26.** <sup>13</sup>C NMR spectrum of 1-hexadecyl-1-methylpiperidinium 2-(4-chloro-2-methylphenoxy)propionate (**13**)



|                        |                                                                 |                      |              |                                            |                 |              |             |
|------------------------|-----------------------------------------------------------------|----------------------|--------------|--------------------------------------------|-----------------|--------------|-------------|
| Acquisition Time (sec) | 5.0001                                                          | Comment              | AB 40        | Date                                       | Apr 17 2015     | Date Stamp   | Apr 17 2015 |
| File Name              | C:\Users\Niemcz\Desktop\Nowy folder\AB40-H1.fid\AB40-H1.fid\fid |                      |              |                                            | Frequency (MHz) | 300.07       |             |
| Nucleus                | <sup>1</sup> H                                                  | Number of Transients | 64           | Original Points Count                      | 25304           | Points Count | 32768       |
| Pulse Sequence         | s2pul                                                           | Solvent              | CHLOROFORM-d | Spectrum Offset (Hz) 2298.5405             |                 |              |             |
| Spectrum Type          | STANDARD                                                        | Sweep Width (Hz)     | 5060.73      | Temperature (degree C) AMBIENT TEMPERATURE |                 |              |             |

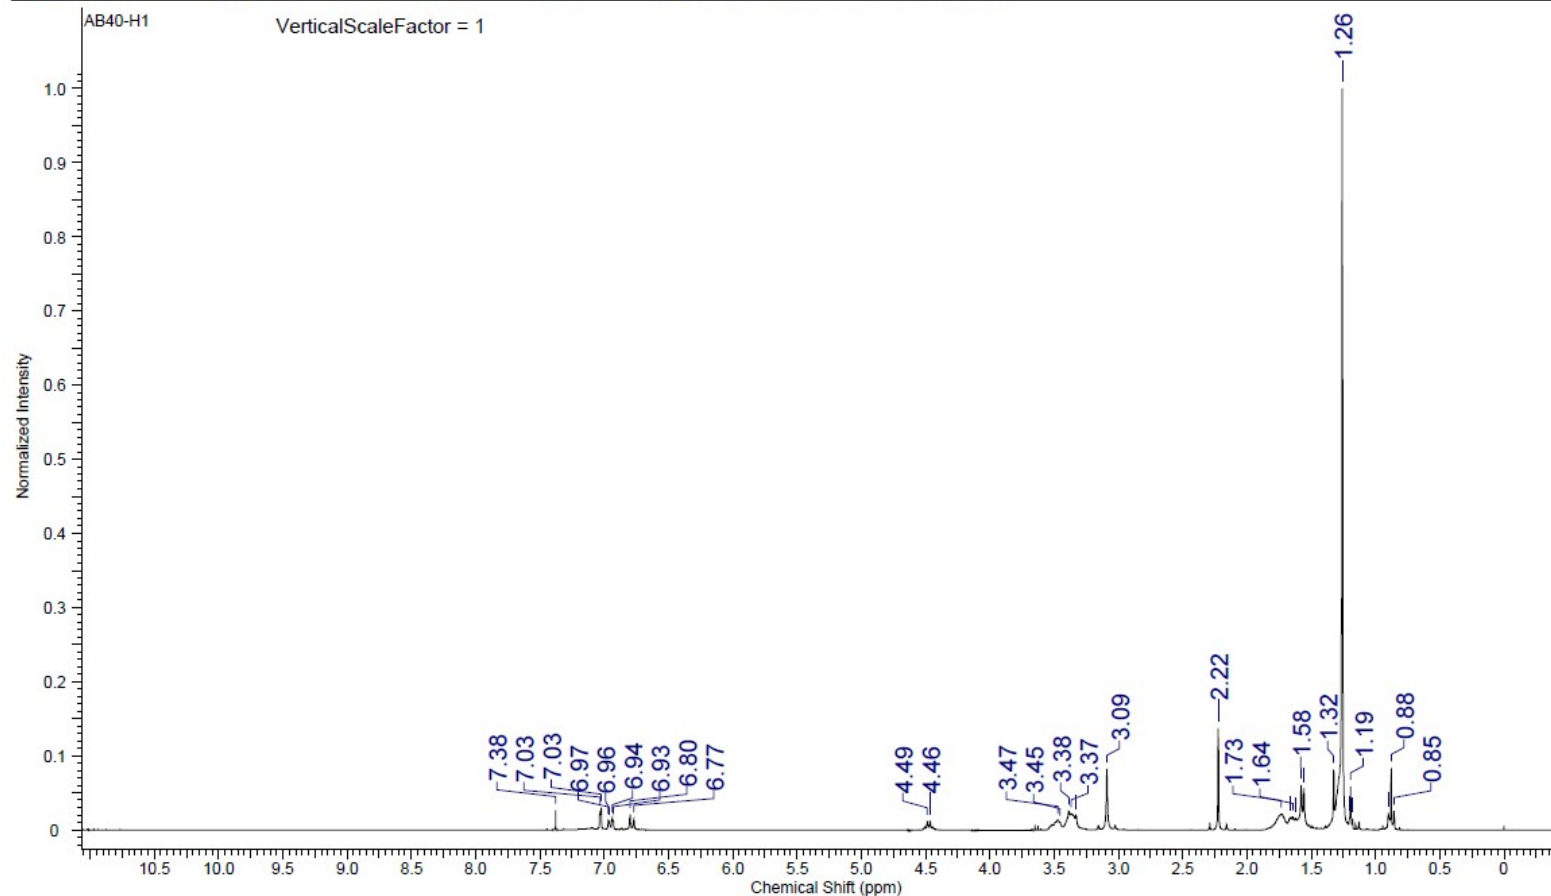

**Figure S27.** <sup>1</sup>H NMR spectrum of 1-methyl-1-octadecylpiperidinium 2-(4-chloro-2-methylphenoxy)propionate (**14**)



|                        |                                                                     |                      |          |                       |              |                        |                     |
|------------------------|---------------------------------------------------------------------|----------------------|----------|-----------------------|--------------|------------------------|---------------------|
| Acquisition Time (sec) | 0.6400                                                              | Comment              | AB 40    | Date                  | Apr 17 2015  | Date Stamp             | Apr 17 2015         |
| File Name              | C:\Users\Niemcz\Desktop\Nowy folder\AB-40-C13.fid\AB-40-C13.fid\fid |                      |          |                       |              | Frequency (MHz)        | 75.46               |
| Nucleus                | <sup>13</sup> C                                                     | Number of Transients | 1964     | Original Points Count | 12191        | Points Count           | 16384               |
| Pulse Sequence         | s2pul                                                               | Receiver Gain        | 34.00    | Solvent               | CHLOROFORM-d |                        |                     |
| Spectrum Offset (Hz)   | 7946.1660                                                           | Spectrum Type        | STANDARD | Sweep Width (Hz)      | 19047.62     | Temperature (degree C) | AMBIENT TEMPERATURE |

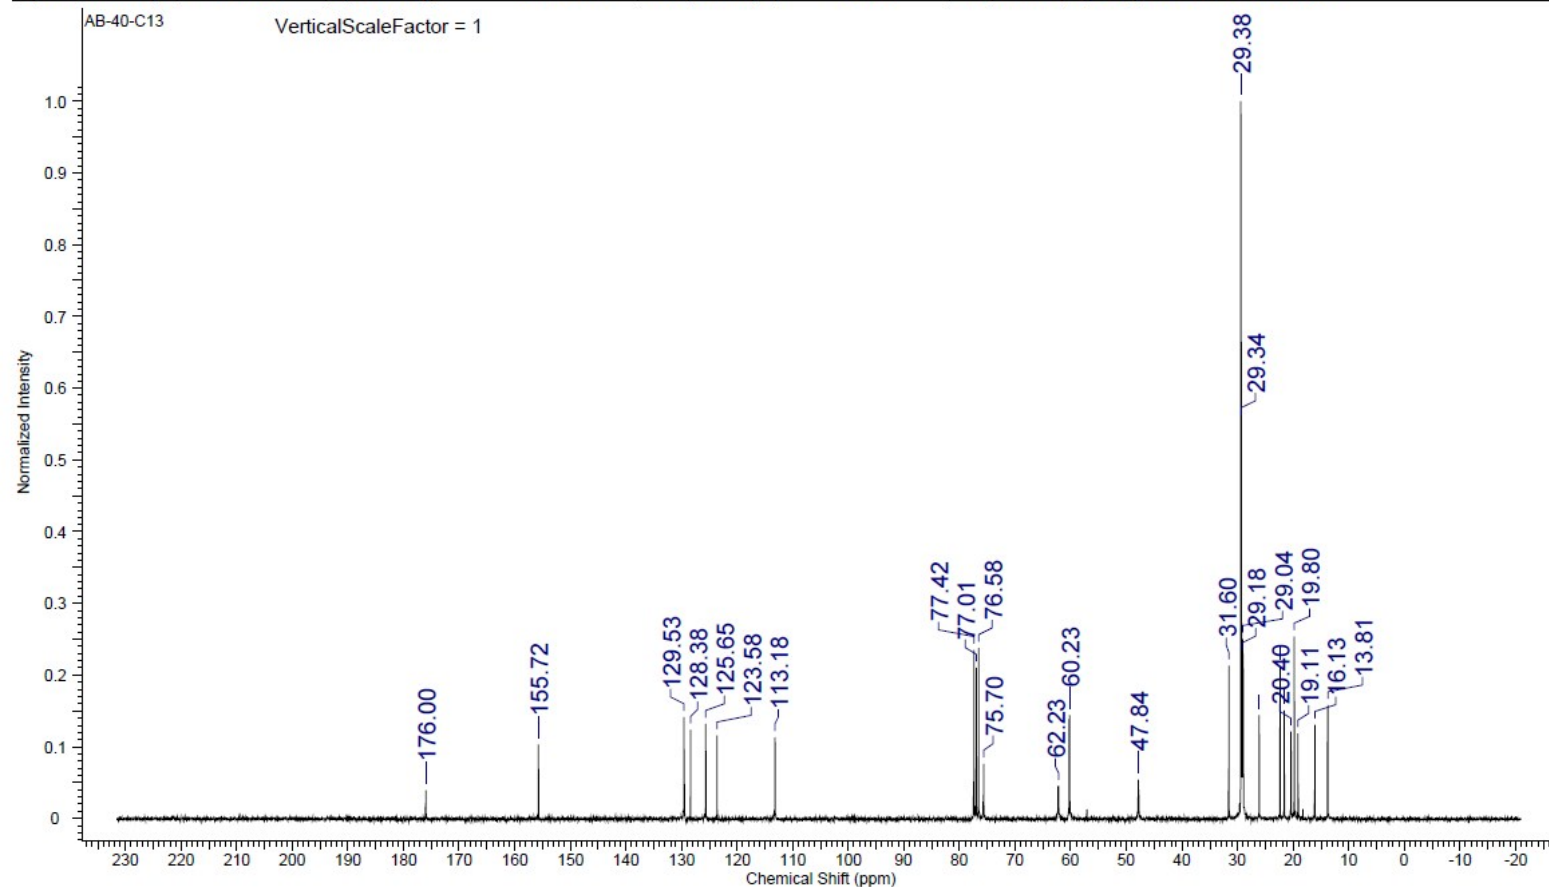

**Figure S28.** <sup>13</sup>C NMR spectrum of 1-methyl-1-octadecylpiperidinium 2-(4-chloro-2-methylphenoxy)propionate (**14**)

The following abbreviations were used to explain the multiplicities:

s = singlet, d = doublet, dd = doublet of doublets, t = triplet, m = multiplet.
